# Supplementary material for: Tuning of the antiferromagnetic-type interaction in photo-excited single-decker porphyrin–lanthanide complexes with different crown capping ligands
Source: Royal Society of Chemistry journal article supplement (doi:10.1039/d3dt02842a), 2023-11-23
Supplement: d3dt02842a1.pdf [file d3dt02842a1.pdf]

## Electronic Supplementary Information

### Tuning the Antiferromagnetic Interaction of Lanthanide-Porphyrin Complexes with Varied Cyclododecane Ligands in Photo-Excitation State

Langit Cahya Adi,<sup>a</sup> Anas Santria,<sup>\*a,b</sup> and Naoto Ishikawa<sup>\*a</sup>

<sup>a</sup>Department of Chemistry, Graduate School of Science, Osaka University, Toyonaka, Osaka 560-0043, Japan

<sup>b</sup>Research Center for Chemistry, National Research and Innovation Agency, Kawasan PUSPITEK, Serpong, Tangerang Selatan, Banten, 15310, Indonesia

Keywords : magnetic interaction, antiferromagnetic, dysprosium and monoporphyrimato

\*Email: iskw@chem.sci.osaka-u.ac.jp (N.I.), asantria@chem.sci.osaka-u.ac.jp (A.S.) or anas.santria@brin.go.id (A.S.)

#### LIST OF FIGURES AND TABLES

- Figure S1.** MALDI-TOF spectra of  $[\text{Dy}(\text{TPP})12\text{C4}]^+$   
**Figure S2.** MALDI-TOF spectra of  $[\text{Dy}(\text{TPP})\text{aza}12\text{C4}]^+$   
**Figure S3.** Absorption and MCD spectra of  $[\text{Dy}(\text{TPP})(12\text{C4})]\text{Cl}$  in B band under varied magnetic field at 1.5 K  
**Figure S4.** Absorption and MCD spectra of  $[\text{Dy}(\text{TPP})(12\text{C4})]\text{Cl}$  in Q band under varied magnetic field at 1.5 K  
**Figure S5.** Absorption and MCD spectra of  $[\text{Dy}(\text{TPP})(\text{aza}12\text{C4})]\text{Cl}$  in B band under varied magnetic field at 1.5 K  
**Figure S6.** Absorption and MCD spectra of  $[\text{Dy}(\text{TPP})(\text{aza}12\text{C4})]\text{Cl}$  in Q band under varied magnetic field at 1.5 K  
**Figure S7.** Band deconvolution of absorption (**a**) and MCD (**b**) of B(0,0) band spectra  $[\text{Dy}(\text{TPP})(12\text{C4})]\text{Cl}$  at 1.5 K and 1 T.  
**Figure S8.** Band deconvolution of absorption (**a**) and MCD (**b**) of Q(0,0) and Q(1,0) bands spectra  $[\text{Dy}(\text{TPP})(12\text{C4})]\text{Cl}$  at 1.5 K and 1 T.  
**Figure S9.** Band deconvolution of absorption (**a**) and MCD (**b**) of B(0,0) band spectra  $[\text{Dy}(\text{TPP})(\text{aza}12\text{C4})]\text{Cl}$  at 1.5 K and 1 T.  
**Figure S10.** Band deconvolution of absorption (**a**) and MCD (**b**) of Q(0,0) and Q(1,0) bands spectra  $[\text{Dy}(\text{TPP})(\text{aza}12\text{C4})]\text{Cl}$  at 1.5 K and 1 T.  
**Figure S11.** Selected molecular orbitals of  $[\text{Dy}(\text{TPP})(12\text{C4})]^+$  generated from CAS(9,7) calculation.  
**Figure S12.** Selected molecular orbitals of  $[\text{Dy}(\text{TPP})(\text{aza}12\text{C4})]^+$  generated from CAS(9,7) calculation.  
**Figure S13.** Main magnetic axes of the  $[\text{Dy}(\text{TPP})(12\text{C4})]^+$  and  $[\text{Dy}(\text{TPP})(\text{aza}12\text{C4})]^+$  extracted from CASSCF/RASSI/SINGLE\_ANISO calculations.  
**Figure S14.** Contour maps of the ratio RMS1/RMS0 for  $[\text{Dy}(\text{TPP})(12\text{C4})]^+$ .  
**Figure S15.** Contour maps of the ratio RMS1/RMS0 for  $[\text{Dy}(\text{TPP})(\text{aza}12\text{C4})]^+$ .
- Table S1.** Parameters of B and Q bands determined by the band deconvolution of absorption and MCD spectra of  $[\text{Dy}(\text{TPP})(12\text{C4})]\text{Cl}$  incorporated into

|                  |                                                                                                                                                                                                                          |
|------------------|--------------------------------------------------------------------------------------------------------------------------------------------------------------------------------------------------------------------------|
|                  | PMMA.                                                                                                                                                                                                                    |
| <b>Table S2.</b> | Parameters of B and Q bands determined by the band deconvolution of absorption and MCD spectra of [Dy(TPP)(aza12C4)]Cl incorporated into PMMA.                                                                           |
| <b>Table S3.</b> | $L_z$ and $\Delta_{JL}$ values of [Dy(TPP)12C4]Cl and [Dy(TPP)aza12C4]Cl with $J_z = 11/2, 13/2,$ and $15/2$ .                                                                                                           |
| <b>Table S4.</b> | Details of <i>ab initio</i> calculations.                                                                                                                                                                                |
| <b>Table S5.</b> | Dipole transition strengths for [Dy(TPP)(12C4)] <sup>+</sup> obtained from CASSCF/RASSI/single_aniso calculations using Basis Set 1.                                                                                     |
| <b>Table S6.</b> | Dipole transition strengths for [Dy(TPP)(aza12C4)] <sup>+</sup> obtained from CASSCF/RASSI/single_aniso calculations using Basis Set 1.                                                                                  |
| <b>Table S7.</b> | The calculated transition energy, orbital and spin angular momenta of the ground doublet and the excited doublet SO states for [Dy(TPP)(12C4)] <sup>+</sup> , generated from CAS(11,13) calculation with basis set 1.    |
| <b>Table S8.</b> | The calculated transition energy, orbital and spin angular momenta of the ground doublet and the excited doublet SO states for [Dy(TPP)(aza12C4)] <sup>+</sup> , generated from CAS(11,13) calculation with basis set 1. |

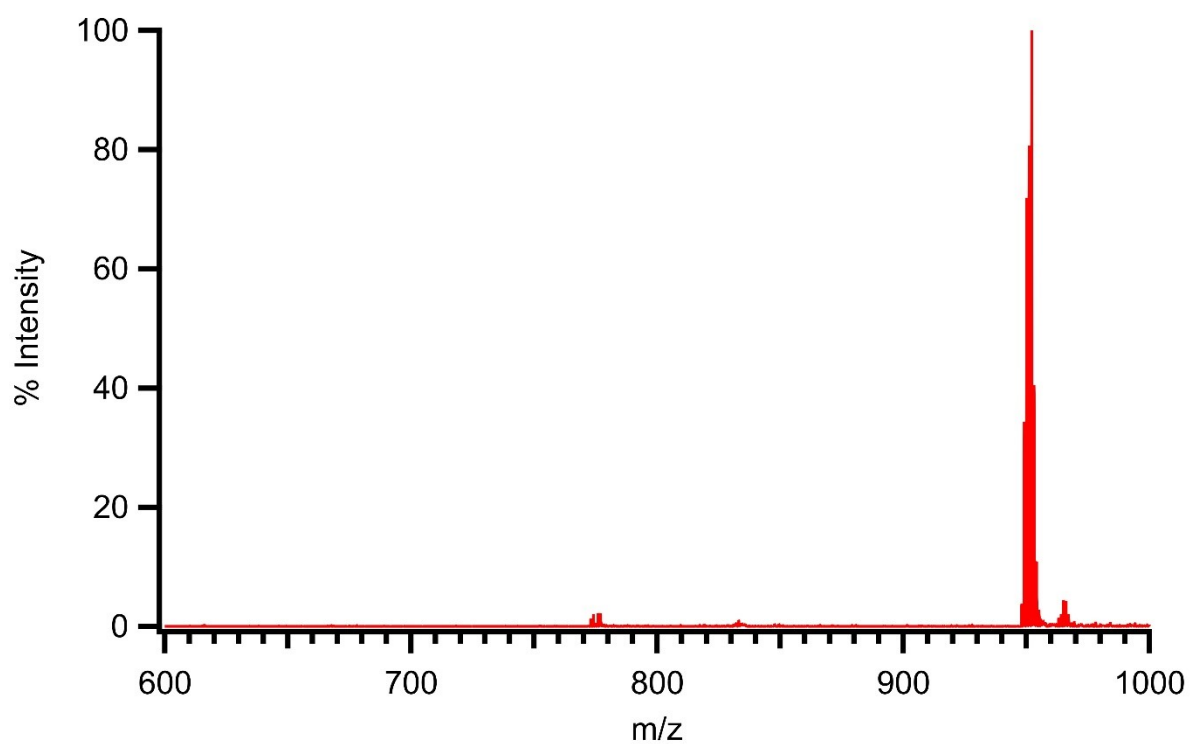

**Figure S1.** MALDI-TOF spectra of  $[\text{Dy}(\text{TPP})(12\text{C}4)]^+$  with m/z equal 952.17.

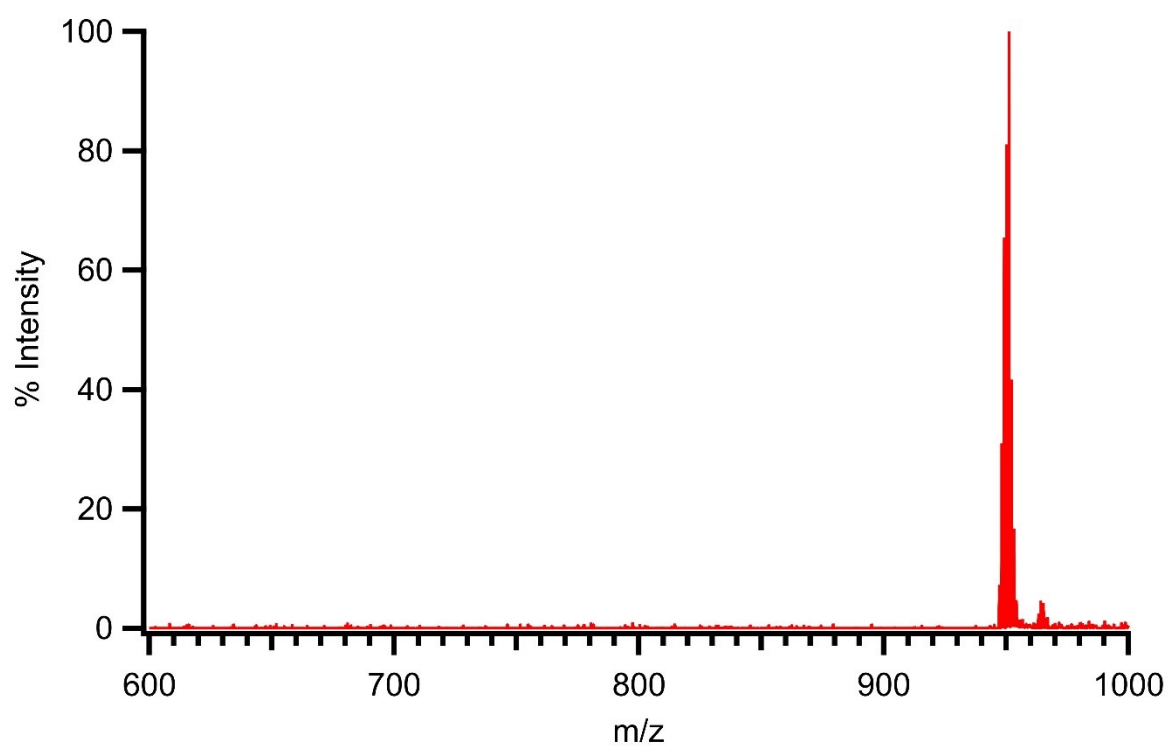

**Figure S2.** MALDI-TOF spectra of  $[\text{Dy}(\text{TPP})(\text{aza}12\text{C}4)]^+$  with m/z equal 951.25.

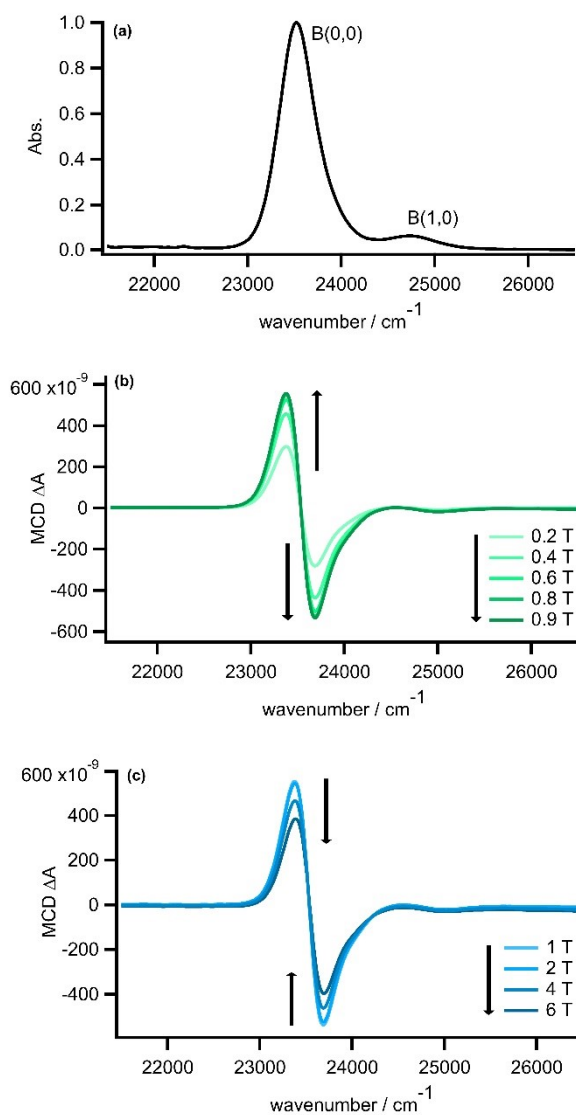

**Figure S3.** (a) Absorption and (b) lower magnetic field-dependent, and (c) higher magnetic field-dependent MCD spectra measured at temperatures of 1.5 K of B band in  $[\text{Dy}(\text{TPP})(12\text{C}4)]\text{Cl}$  in PMMA film.

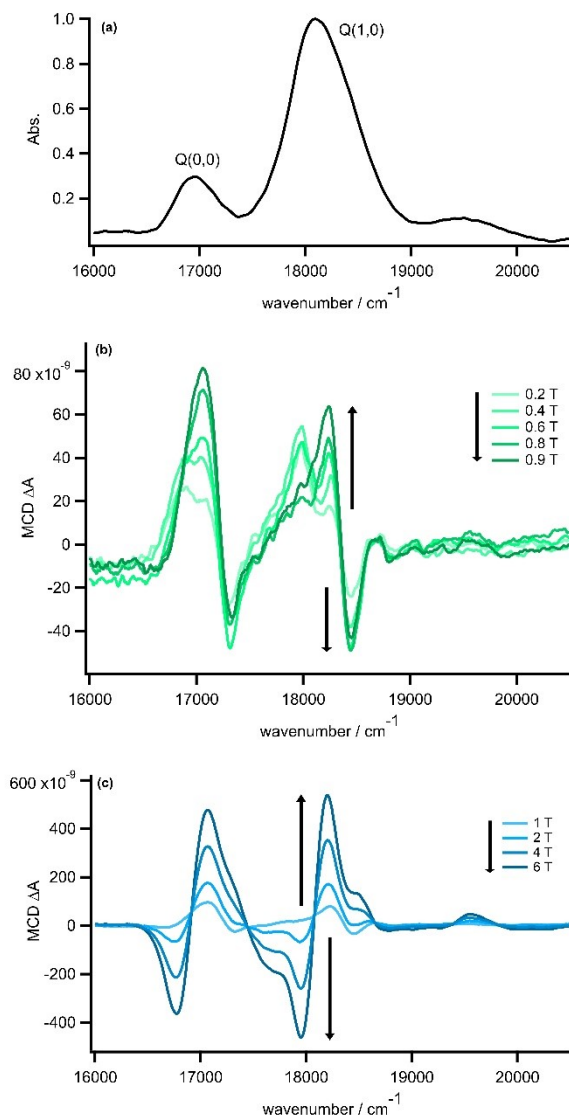

**Figure S4.** (a) Absorption and (b) lower magnetic field-dependent, and (c) higher magnetic field-dependent MCD spectra measured at temperatures of 1.5 K of Q band in  $[\text{Dy}(\text{TPP})(12\text{C}4)]\text{Cl}$  in PMMA film.

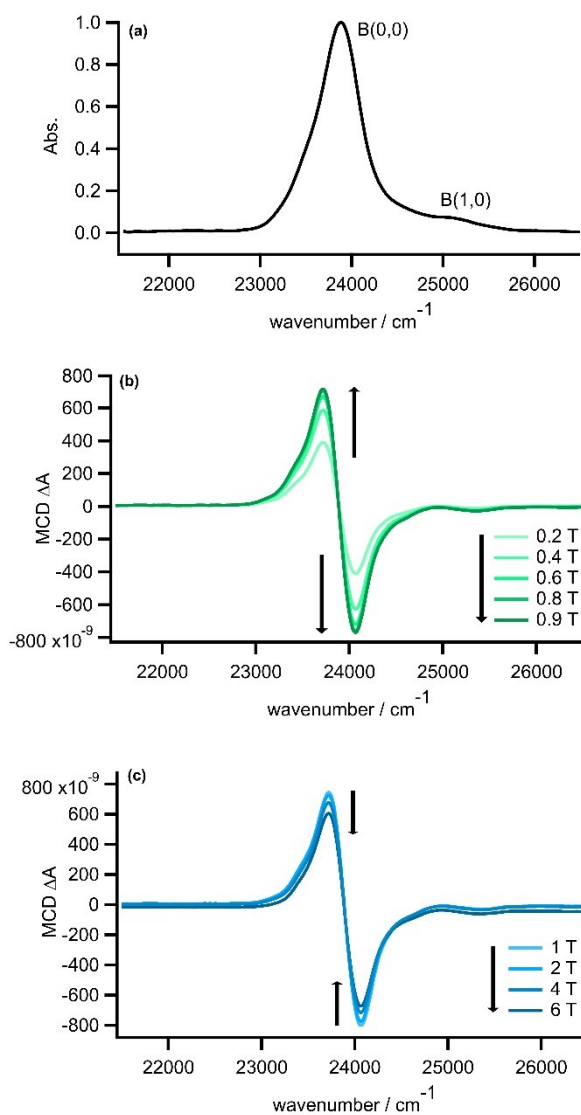

**Figure S5.** (a) Absorption and (b) lower magnetic field-dependent, and (c) higher magnetic field-dependent MCD spectra measured at temperatures of 1.5 K of B band in  $[\text{Dy}(\text{TPP})(\text{aza12C4})]\text{Cl}$  in PMMA film.

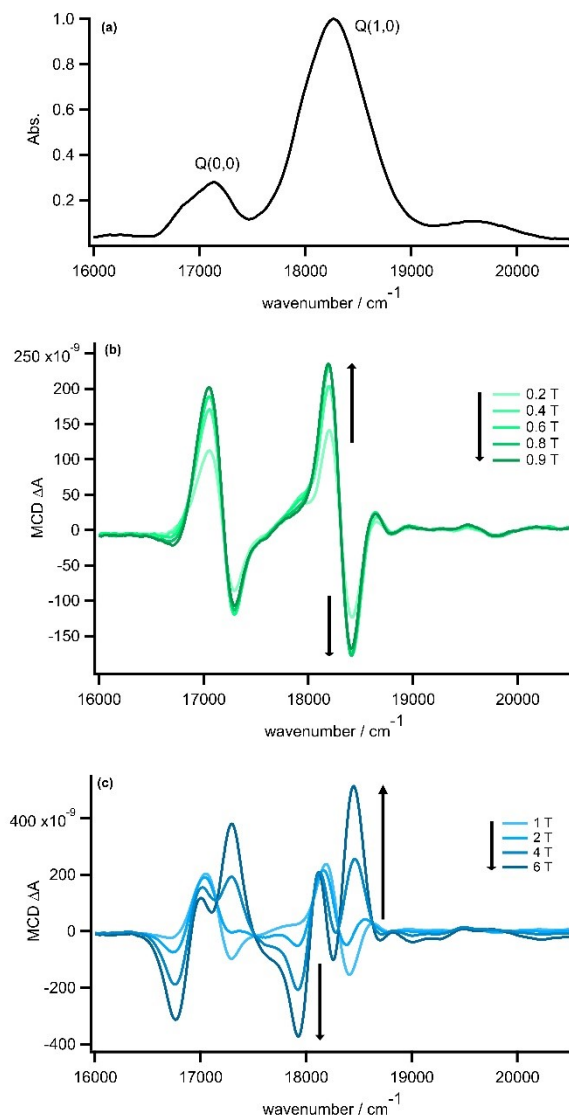

**Figure S6.** (a) Absorption and (b) lower magnetic field-dependent, and (c) higher magnetic field-dependent MCD spectra measured at temperatures of 1.5 K of Q band in  $[\text{Dy}(\text{TPP})(\text{aza12C4})]\text{Cl}$  in PMMA film.

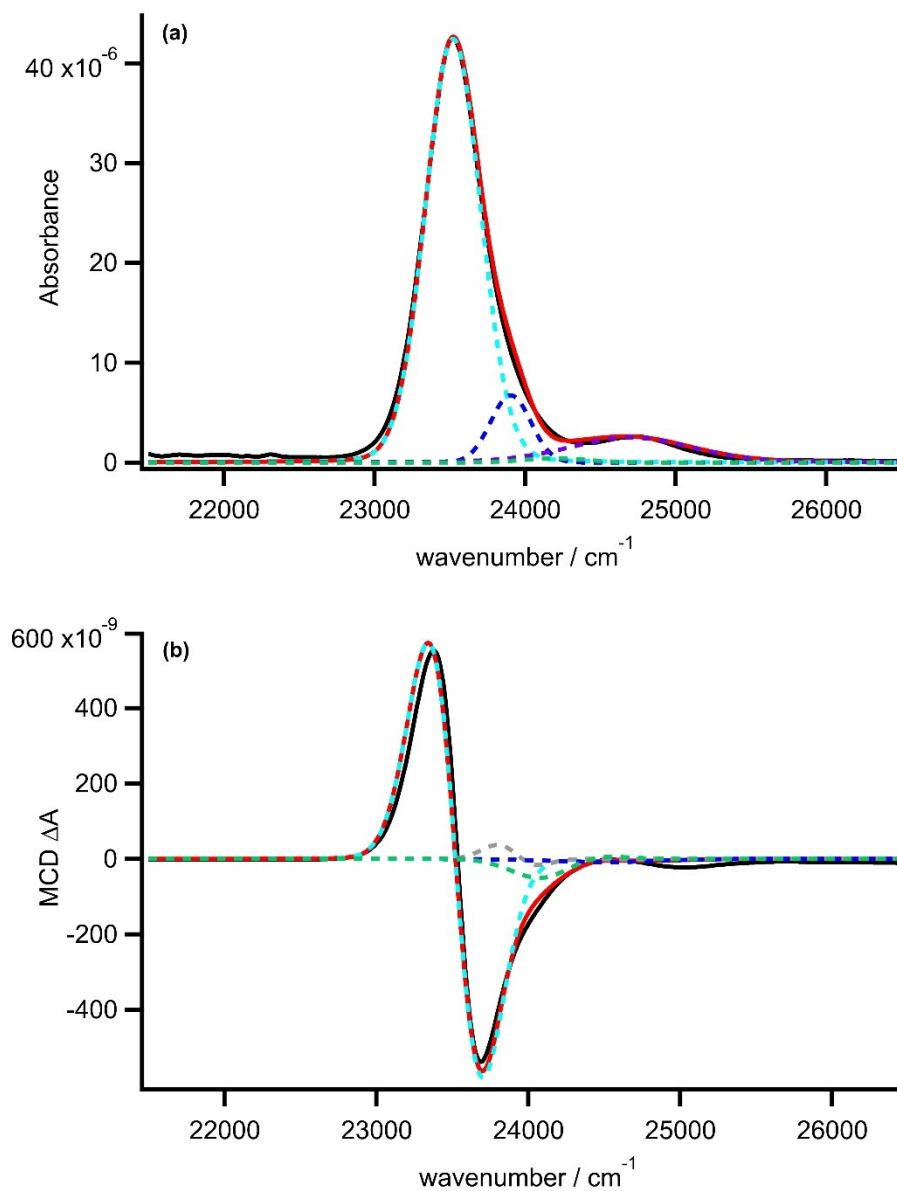

**Figure S7.** Band deconvolution of absorption (a) and MCD (b) of B(0,0) band spectra [Dy(TPP)(12C4)]Cl at 1.5 K and 1 T. Experimental spectra is shown in black while simulated band is in red color. The components that give the simulated band are in dashed lines.

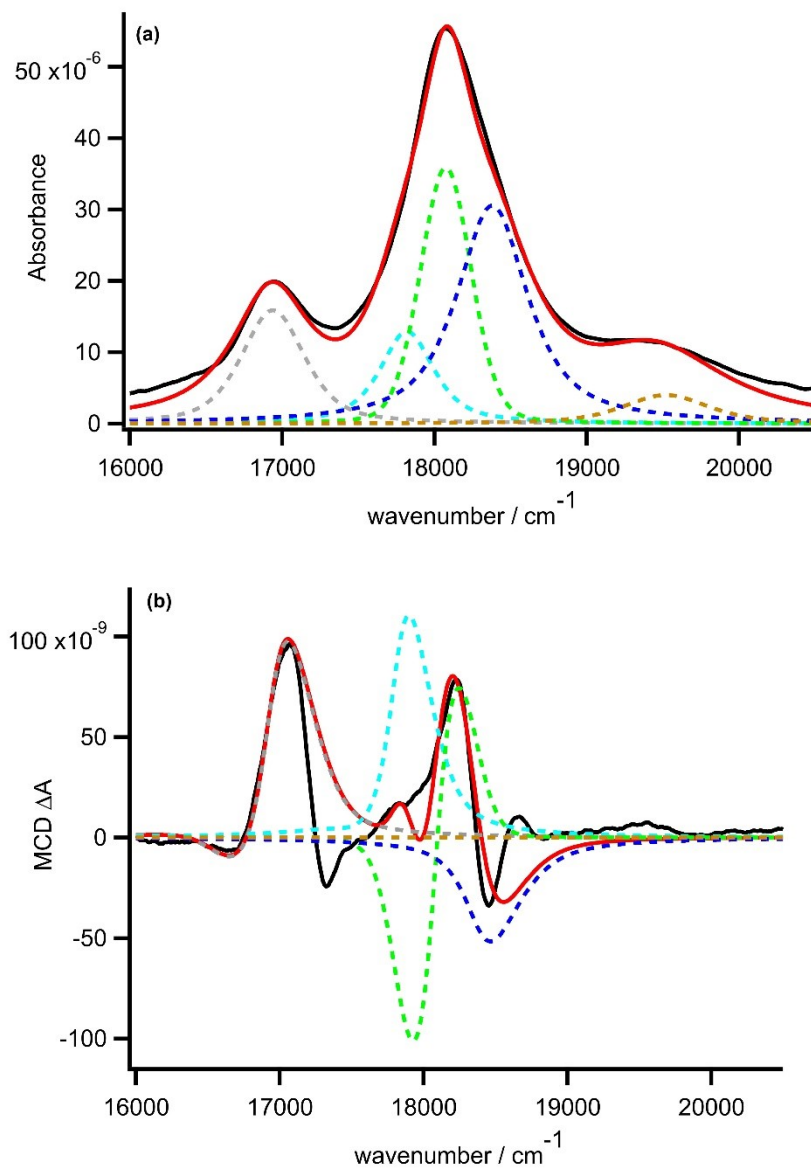

**Figure S8.** Band deconvolution of absorption **(a)** and MCD **(b)** of Q(0,0) and Q(1,0) bands spectra [Dy(TPP)(12C4)]Cl at 1.5 K and 1 T. Experimental spectra is shown in black while simulated band is in red color. The components that give the simulated band are in dashed lines.

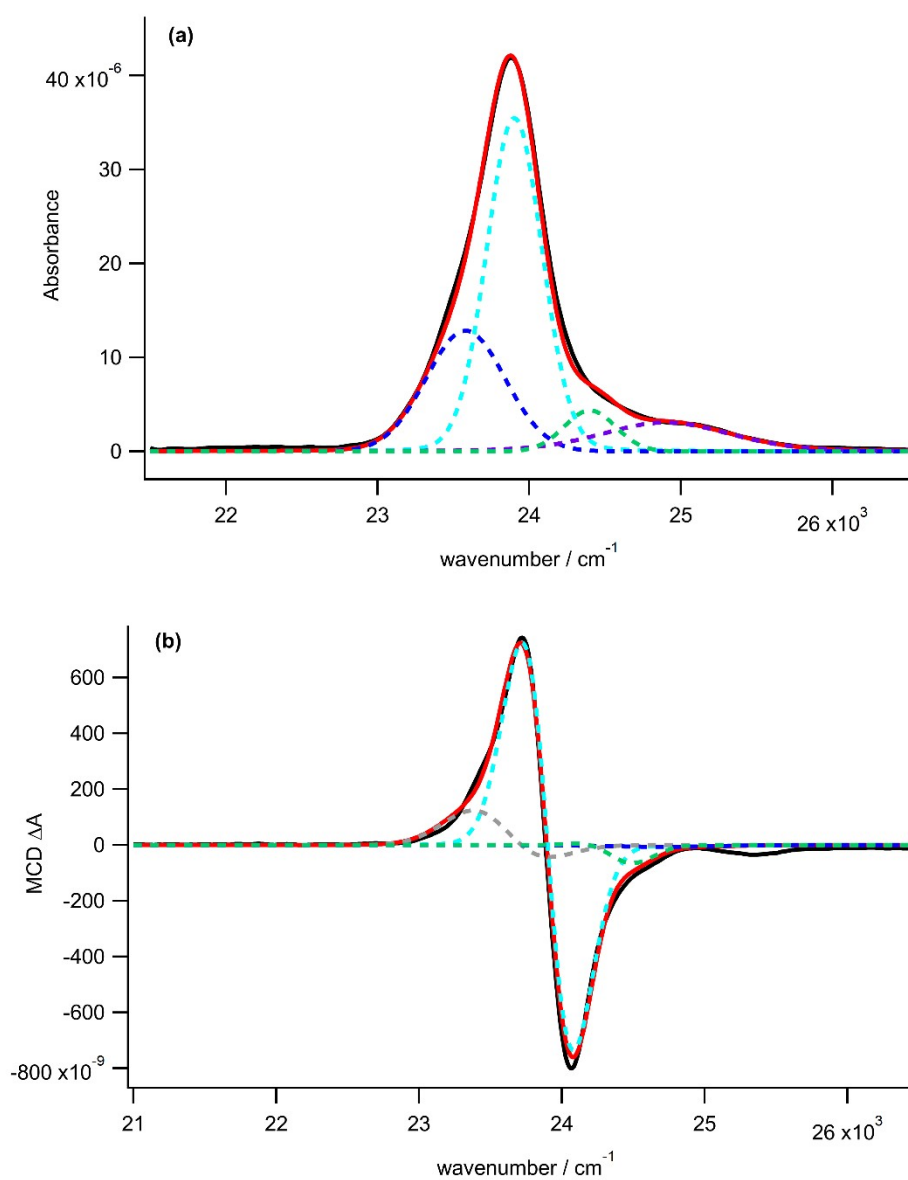

**Figure S9.** Band deconvolution of absorption (a) and MCD (b) of B(0,0) band spectra [Dy(TPP)(aza12C4)]Cl at 1.5 K and 1 T. Experimental spectra is shown in black while simulated band is in red color. The components that give the simulated band are in dashed lines.



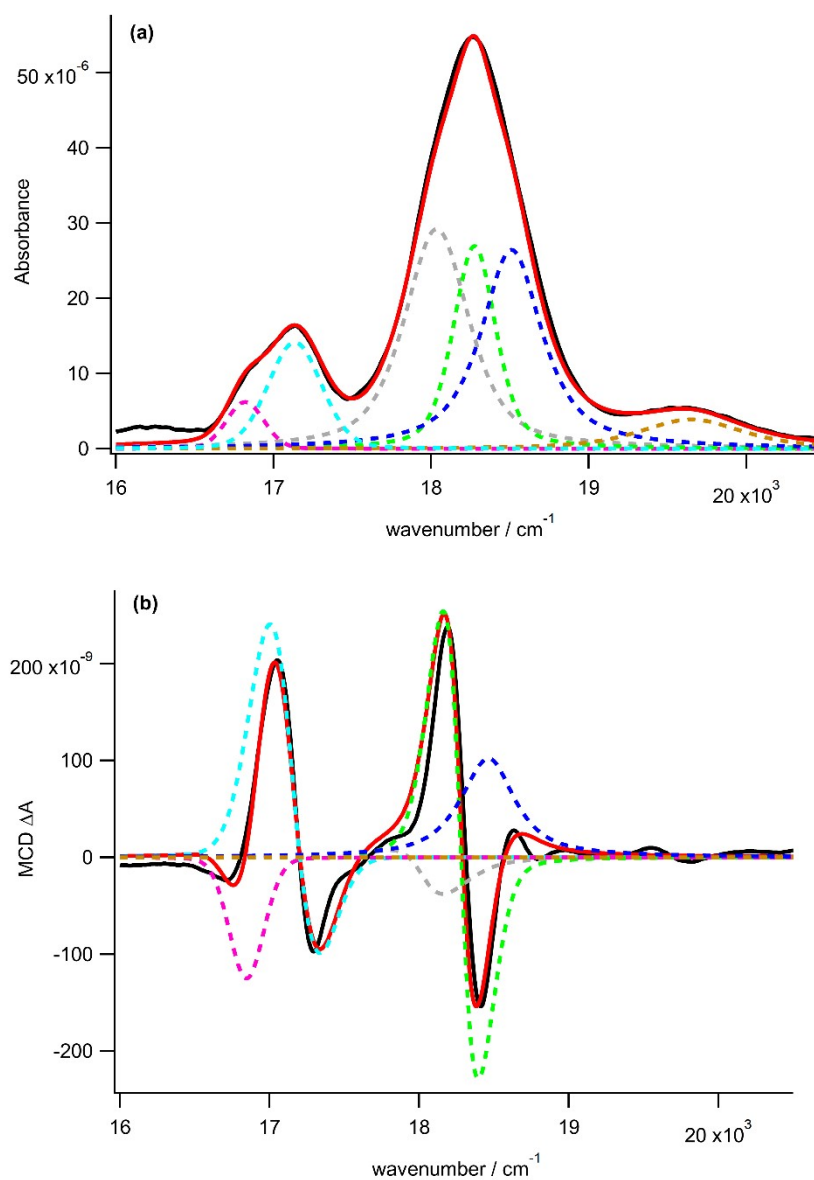

**Figure S10.** Band deconvolution of absorption (a) and MCD (b) of Q(0,0) and Q(1,0) bands spectra [Dy(TPP)(aza12C4)]Cl at 1.5 K and 1 T. Experimental spectra is shown in black while simulated band is in red color. The components that give the simulated band are in dashed lines.

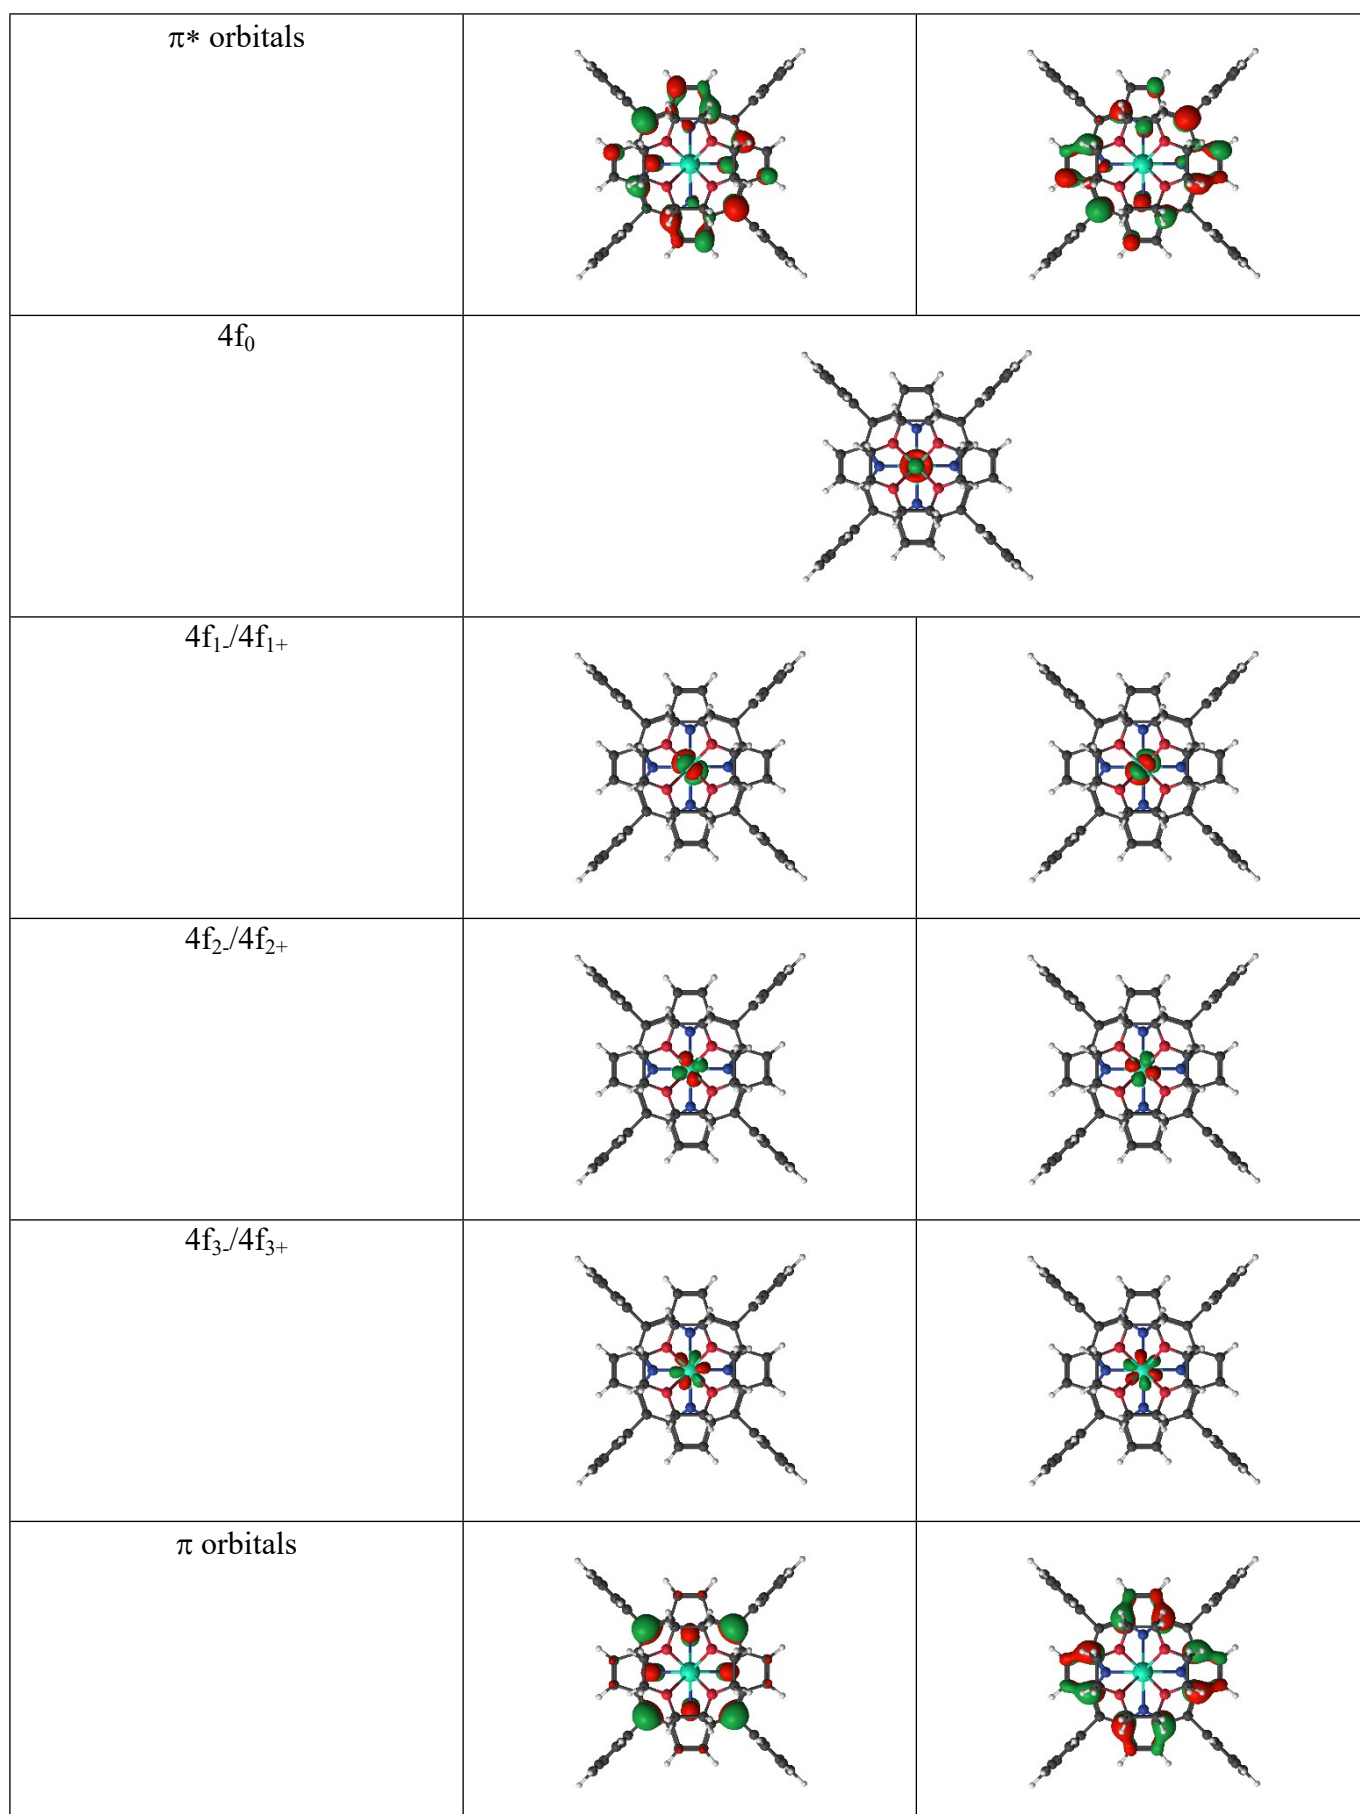

**Figure S11.** Selected molecular orbitals of  $[\text{Dy}(\text{TPP})(12\text{C}4)]^+$  generated from CAS(9,7) calculation.

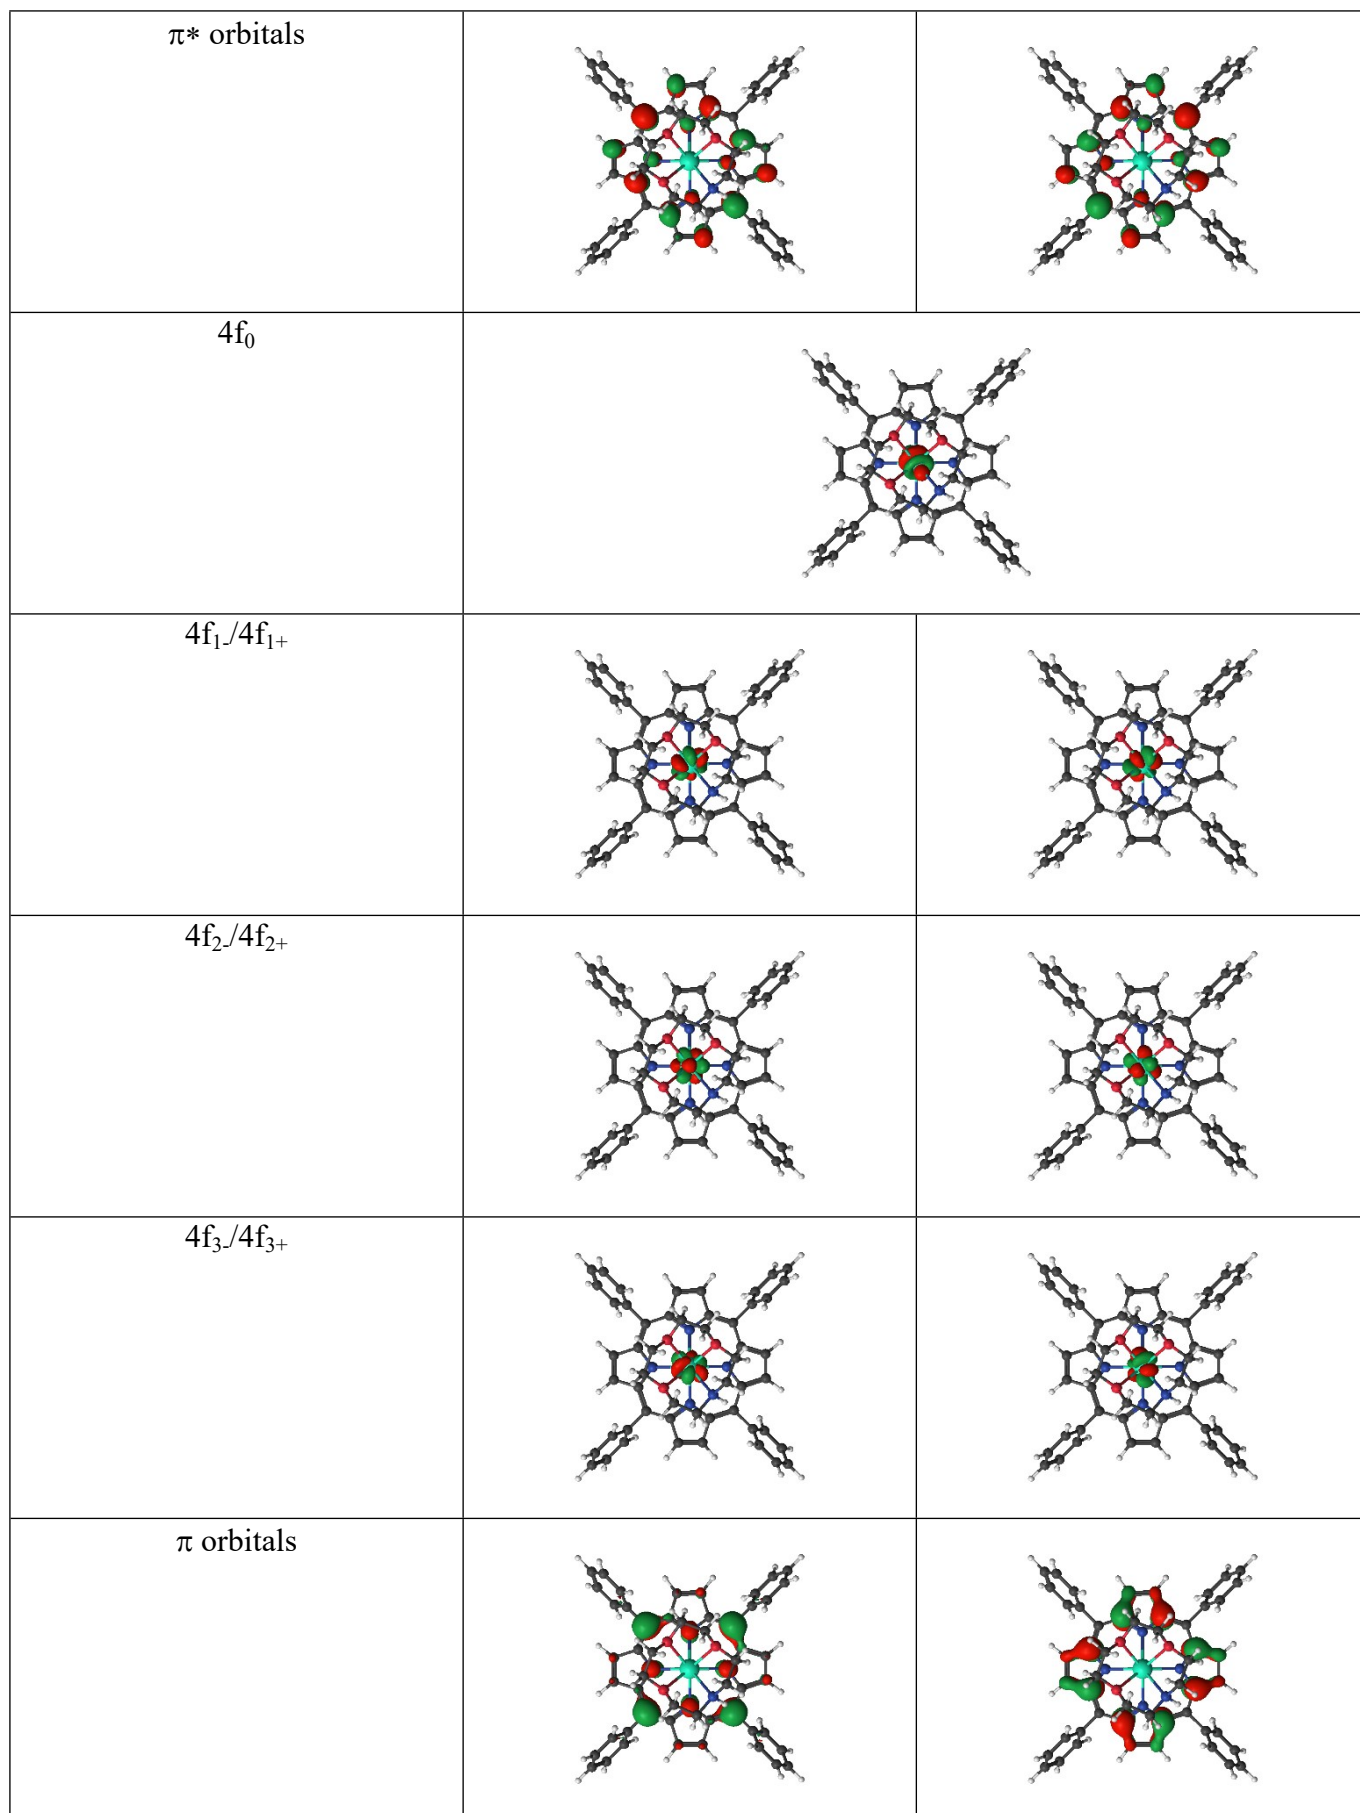

**Figure S12.** Selected molecular orbitals of  $[\text{Dy}(\text{TPP})(\text{aza12C4})]^+$  generated from CAS(9,7) calculation

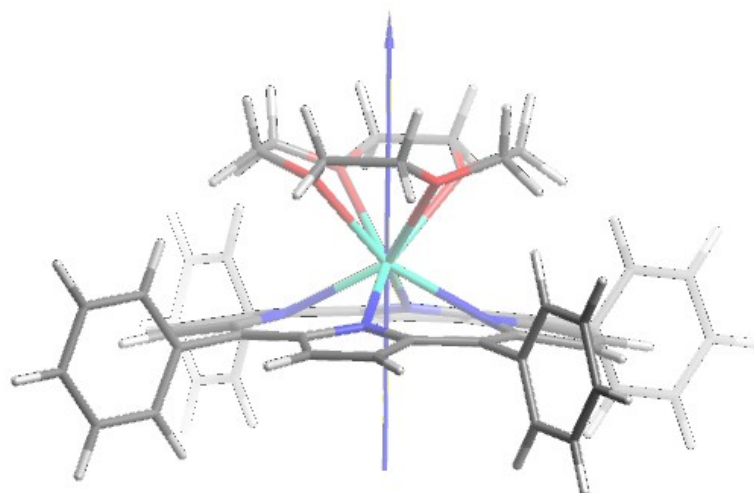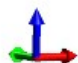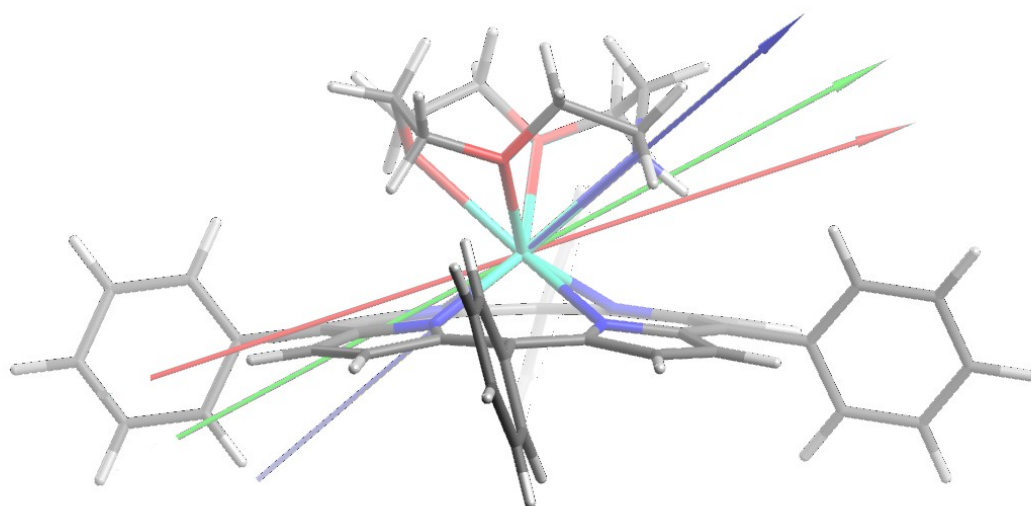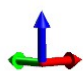

**Figure S13.** Main magnetic axes of the  $[\text{Dy}(\text{TPP})(12\text{C}4)]^+$  (top) and  $[\text{Dy}(\text{TPP})(\text{aza}12\text{C}4)]^+$  (bottom) extracted from CASSCF/RASSI/SINGLE\_ANISO calculations.

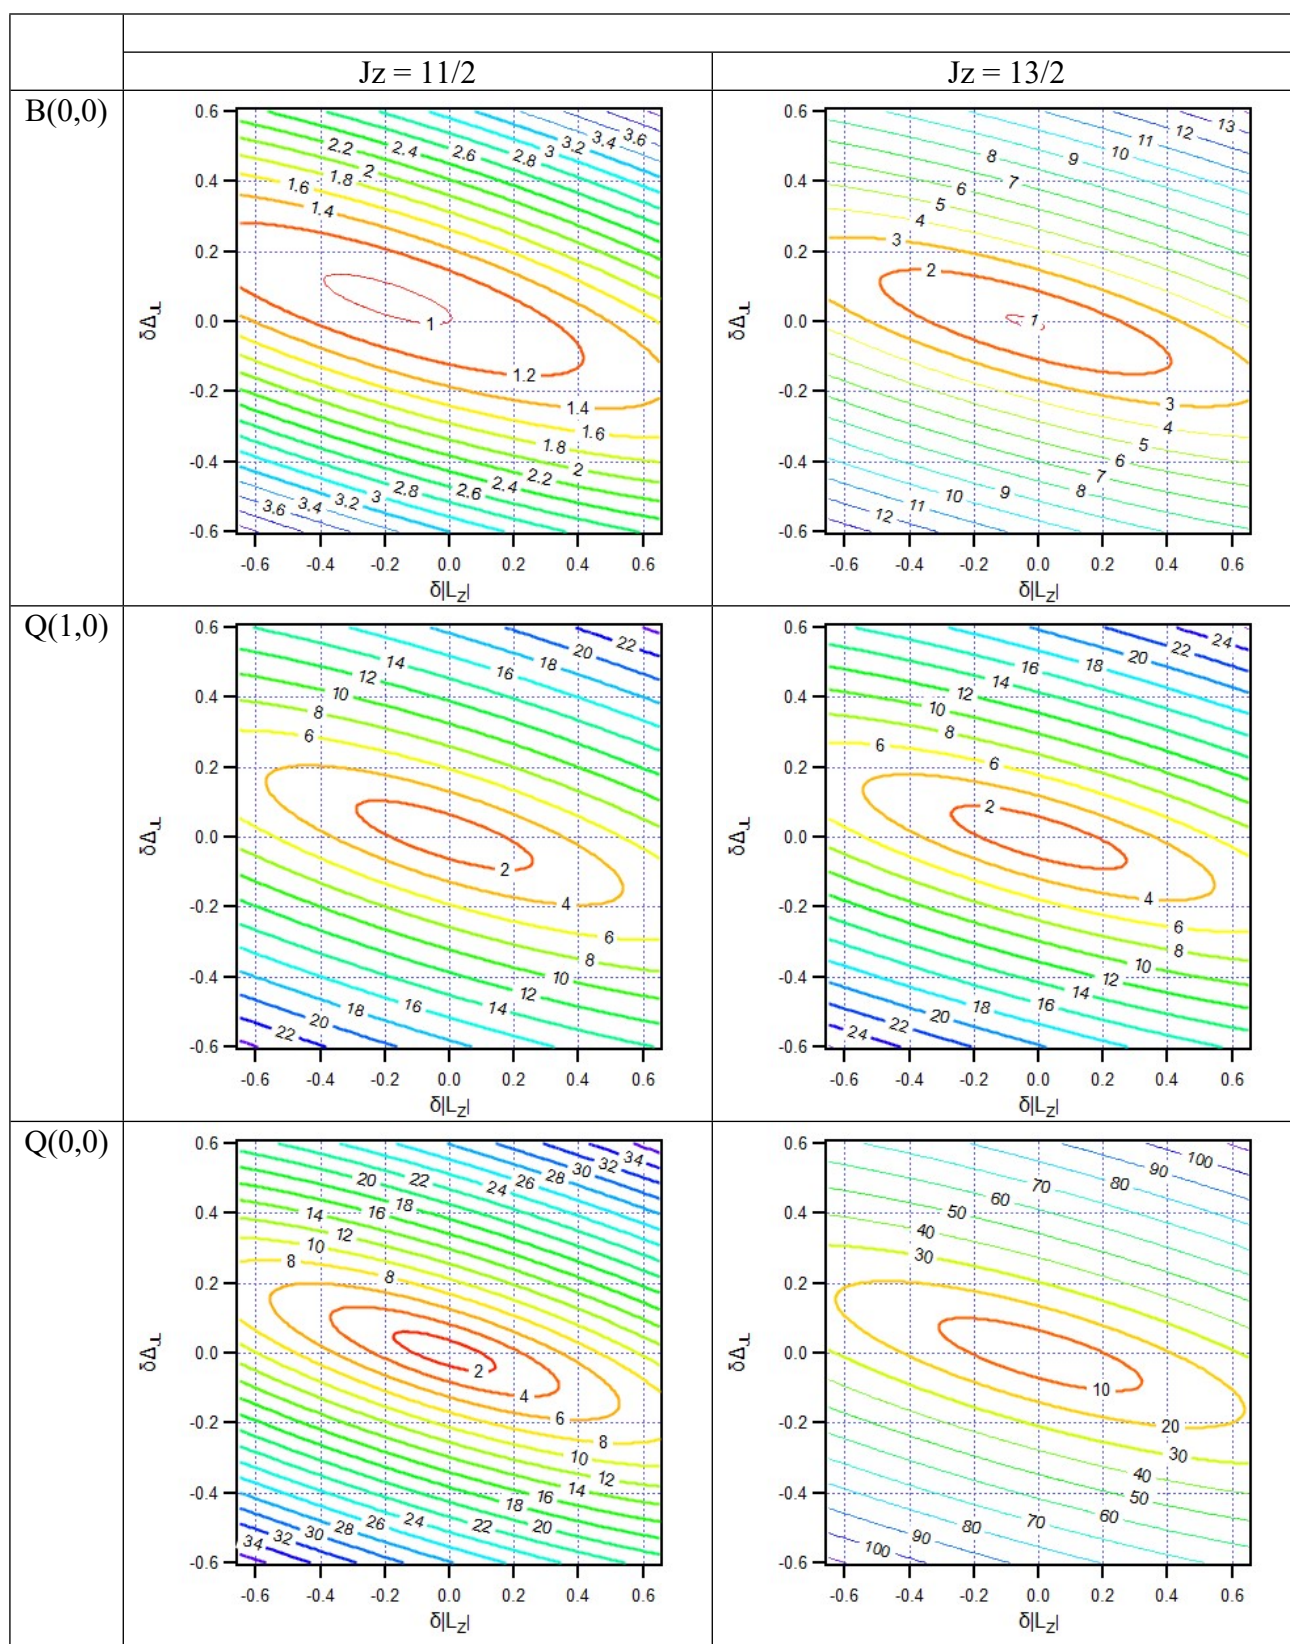

**Figure S14.** Contour maps of the ratio  $RMS1/RMS0$  for  $[Dy(TPP)(12C4)]^+$ , where  $RMS0$  is the minimum RMS error obtained with the two parameters ( $|L_z|$  and  $\Delta_{JL}$ ) determined by means of least-square procedure, and  $RMS1$  is the RMS error obtained varying two parameters of the two by the values indicated in the vertical and horizontal axes.

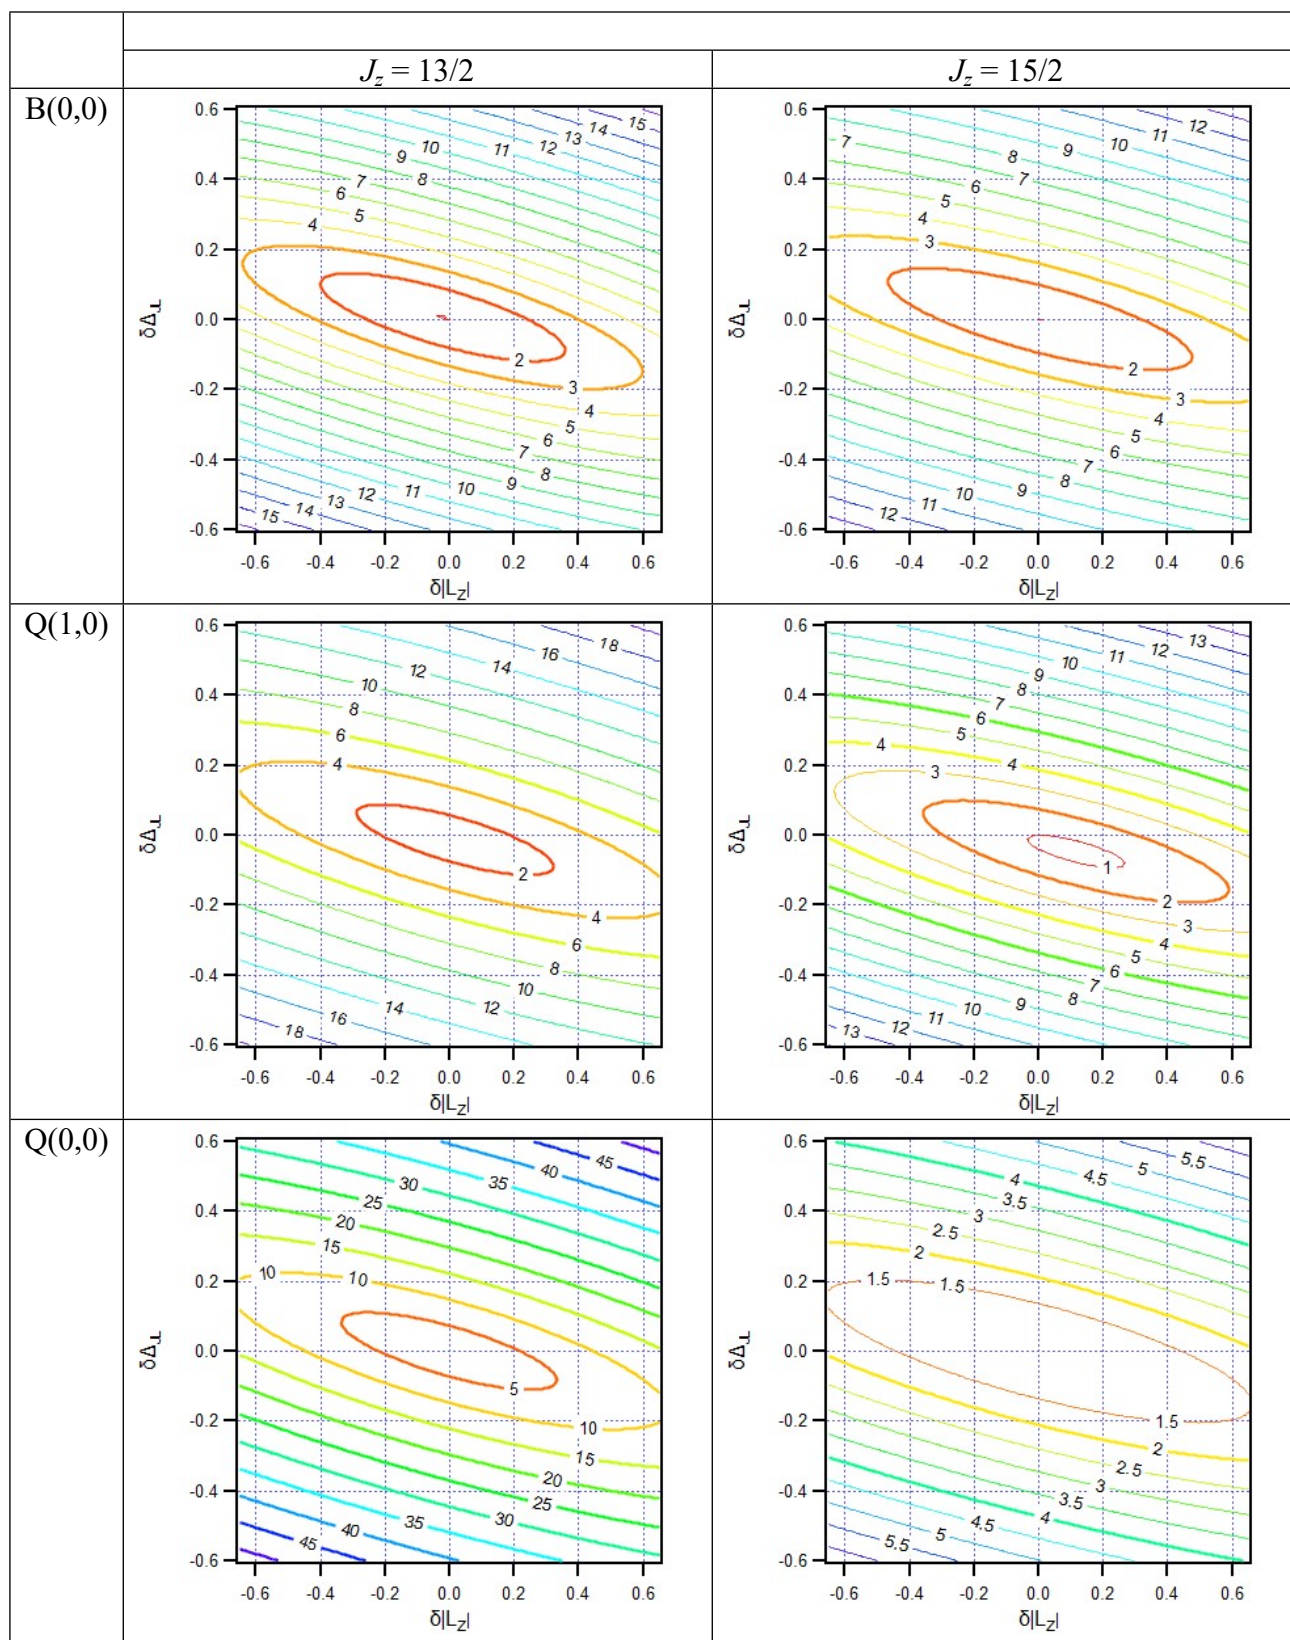

**Figure S15.** Contour maps of the ratio RMS1/RMS0 for  $[\text{Dy}(\text{TPP})(\text{aza12C4})]^+$ , where RMS0 is the minimum RMS error obtained with the two parameters ( $|L_z|$  and  $\Delta_{JL}$ ) determined by means of least-square procedure, and RMS1 is the RMS error obtained varying two parameters of the two by the values indicated in the vertical and horizontal axes.

**Table S1.** Parameters of B and Q bands determined by the band deconvolution of absorption and MCD spectra of [Dy(TPP)(12C4)]Cl incorporated into PMMA.

|                                           |                                | Q band   |         |          |          |         | B band    |          |           |          |
|-------------------------------------------|--------------------------------|----------|---------|----------|----------|---------|-----------|----------|-----------|----------|
|                                           |                                | Band 1   | Band 2  | Band 3   | Band 4   | Band 5  | Band 6    | Band 7   | Band 8    | Band 9   |
| $E_0$ (cm <sup>-1</sup> ) <sup>§</sup>    |                                | 16940    | 17820   | 18075    | 18380    | 19520   | 23522     | 23905    | 24200     | 24700    |
| $\Gamma$ (cm <sup>-1</sup> ) <sup>§</sup> |                                | 492      | 420     | 393      | 555      | 670     | 431       | 313      | 500       | 960      |
| $\eta$ <sup>§</sup>                       |                                | 0.622    | 0.76    | 0.22     | 0.86     | 0.67    | 0.08      | 0.00     | 0.00      | 0.30     |
| $D_0$                                     |                                | 0.45     | 0.33    | 0.69     | 1.07     | 0.16    | 22.51     | 2.52     | 0.26      | 3.19     |
| <i>Values obtained under 1 T</i>          |                                |          |         |          |          |         |           |          |           |          |
| T (K)                                     |                                | Band 1   | Band 2  | Band 3   | Band 4   | Band 5  | Band 6    | Band 7   | Band 8    | Band 9   |
| 100                                       | A <sub>1</sub> /D <sub>0</sub> | 3.48136  | 2.65953 | 2.23240  | 0.10506  | 0.00000 | 0.29685   | 0.13878  | 0.78125   | 0.31369  |
|                                           | B <sub>0</sub> /D <sub>0</sub> | 0.00078  | 0.01335 | -0.00464 | -0.00162 | 0.00000 | -0.00008  | 0.00000  | 0.00000   | -0.00314 |
| 1.5                                       | A <sub>1</sub> /D <sub>0</sub> | 2.33216  | 1.99032 | 1.47701  | -0.40669 | 0.00000 | -8.88516  | -1.76705 | 38.28125  | 1.50575  |
|                                           | B <sub>0</sub> /D <sub>0</sub> | 0.00894  | 0.01489 | -0.00127 | -0.00316 | 0.00000 | -0.00027  | 0.00564  | -0.19375  | -0.00627 |
| <i>Values obtained at 1.5 K</i>           |                                |          |         |          |          |         |           |          |           |          |
| B (T)                                     |                                | Band 1   | Band 2  | Band 3   | Band 4   | Band 5  | Band 6    | Band 7   | Band 8    | Band 9   |
| 1                                         | A <sub>1</sub> /D <sub>0</sub> | 2.33216  | 1.99031 | 1.47701  | -0.40669 | 0.00000 | -8.88516  | -1.76705 | 38.28125  | 1.50575  |
|                                           | B <sub>0</sub> /D <sub>0</sub> | 0.00894  | 0.01183 | -0.00117 | -0.00316 | 0.00000 | -0.00027  | 0.00564  | -0.19375  | -0.00627 |
| 2                                         | A <sub>1</sub> /D <sub>0</sub> | 2.91004  | 2.32836 | 1.84483  | 0.29289  | 0.00000 | -4.23276  | -0.97145 | 31.25000  | 1.50575  |
|                                           | B <sub>0</sub> /D <sub>0</sub> | 0.00551  | 0.01335 | -0.00222 | -0.00111 | 0.00000 | 0.00022   | -0.00075 | -0.10156  | -0.00627 |
| 3                                         | A <sub>1</sub> /D <sub>0</sub> | 3.13301  | 2.17965 | 1.98731  | 0.29289  | 0.00000 | -2.58865  | -0.49064 | 19.53125  | 1.50575  |
|                                           | B <sub>0</sub> /D <sub>0</sub> | 0.00372  | 0.01335 | -0.00265 | -0.00112 | 0.00000 | -0.00008  | -0.00075 | -0.06250  | -0.00627 |
| 4                                         | A <sub>1</sub> /D <sub>0</sub> | 3.236581 | 2.63255 | 2.06046  | 0.29289  | 0.00000 | -1.81296  | -0.57493 | 16.40625  | 1.50575  |
|                                           | B <sub>0</sub> /D <sub>0</sub> | 0.003728 | 0.01395 | -0.00391 | -0.00111 | 0.00000 | -0.00008  | -0.00075 | -0.01953  | -0.00627 |
| 5                                         | A <sub>1</sub> /D <sub>0</sub> | 3.27301  | 2.48385 | 2.08872  | 0.29289  | 0.00000 | -1.30729  | -0.33703 | 15.625    | 1.50575  |
|                                           | B <sub>0</sub> /D <sub>0</sub> | 0.00275  | 0.01335 | -0.00392 | -0.00111 | 0.00000 | -0.000003 | -0.00075 | -0.015625 | -0.00627 |
| 6                                         | A <sub>1</sub> /D <sub>0</sub> | 3.33468  | 2.48385 | 2.11017  | 0.29289  | 0.00000 | -0.99065  | -0.13877 | 11.71875  | 1.56848  |
|                                           | B <sub>0</sub> /D <sub>0</sub> | 0.00227  | 0.01228 | -0.00392 | -0.00111 | 0.00000 | -0.00003  | -0.00075 | -0.01172  | -0.00627 |

**Table S2.** Parameters of B and Q bands determined by the band deconvolution of absorption and MCD spectra of [Dy(TPP)(aza12C4)]Cl incorporated into PMMA.

|                                           |                                | Q band   |          |          |          |          | B band  |          |           |          |          |
|-------------------------------------------|--------------------------------|----------|----------|----------|----------|----------|---------|----------|-----------|----------|----------|
|                                           |                                | Band 1   | Band 2   | Band 3   | Band 4   | Band 5   | Band 6  | Band 7   | Band 8    | Band 9   | Band 10  |
| $E_0$ (cm <sup>-1</sup> ) <sup>§</sup>    |                                | 16820    | 17135    | 18035    | 18275    | 18510    | 19650   | 23580    | 23902     | 24400    | 24900    |
| $\Gamma$ (cm <sup>-1</sup> ) <sup>§</sup> |                                | 280      | 400      | 485      | 320      | 460      | 780     | 613      | 431       | 400      | 1000     |
| $\eta^{\ddagger}$                         |                                | 0.10     | 0.19     | 0.69     | 0.52     | 0.85     | 0.68    | 0.00     | 0.08      | 0.00     | 0.30     |
| $D_0$                                     |                                | 0.08     | 0.29     | 0.87     | 0.49     | 0.80     | 0.19    | 11.52    | 23.20     | 2.55     | 4.98     |
| <i>Values obtained under 1 T</i>          |                                |          |          |          |          |          |         |          |           |          |          |
| T (K)                                     |                                | Band 1   | Band 2   | Band 3   | Band 4   | Band 5   | Band 6  | Band 7   | Band 8    | Band 9   | Band 10  |
| 100                                       | A <sub>1</sub> /D <sub>0</sub> | 3.00521  | 2.95580  | 1.47102  | 0.83642  | -0.24924 | 0.00000 | 0.21320  | 0.03500   | 0.01262  | -0.20089 |
|                                           | B <sub>0</sub> /D <sub>0</sub> | 0.00128  | 0.00339  | -0.00059 | 0.00366  | -0.00036 | 0.00000 | -0.00038 | 0.00028   | -0.00038 | 0.00000  |
| 1.5                                       | A <sub>1</sub> /D <sub>0</sub> | 1.31009  | -6.51392 | -0.28604 | -4.33780 | -0.30353 | 0.00000 | -1.77543 | -12.68273 | -3.53496 | 0.96428  |
|                                           | B <sub>0</sub> /D <sub>0</sub> | -0.02752 | 0.01379  | -0.00265 | 0.00152  | 0.00791  | 0.00000 | 0.02592  | -0.00940  | -0.02570 | -0.00402 |
| <i>Values obtained at 1.5 K</i>           |                                |          |          |          |          |          |         |          |           |          |          |
| B (T)                                     |                                | Band 1   | Band 2   | Band 3   | Band 4   | Band 5   | Band 6  | Band 7   | Band 8    | Band 9   | Band 10  |
| 1                                         | A <sub>1</sub> /D <sub>0</sub> | 1.31009  | -6.51392 | -0.28604 | -4.33780 | -0.30353 | 0.00000 | -1.77543 | -12.68273 | -3.53496 | 0.96428  |
|                                           | B <sub>0</sub> /D <sub>0</sub> | -0.02752 | 0.01379  | -0.00265 | 0.00152  | 0.00791  | 0.00000 | 0.02592  | -0.00940  | -0.02570 | -0.00402 |
| 2                                         | A <sub>1</sub> /D <sub>0</sub> | 0.00000  | -1.69781 | 0.45767  | -1.70857 | -0.52911 | 0.00000 | -1.32789 | -6.44670  | -0.86410 | 0.96428  |
|                                           | B <sub>0</sub> /D <sub>0</sub> | -0.02402 | 0.01312  | -0.00250 | -0.00056 | 0.00572  | 0.00000 | 0.01003  | -0.00300  | -0.01283 | -0.00402 |
| 3                                         | A <sub>1</sub> /D <sub>0</sub> | 1.44938  | 0.00359  | 0.68650  | -0.81554 | 0.01816  | 0.00000 | -0.59414 | -4.21795  | -0.47133 | 0.96428  |
|                                           | B <sub>0</sub> /D <sub>0</sub> | -0.01061 | 0.00874  | -0.00300 | 0.00138  | 0.00479  | 0.00000 | 0.00712  | -0.00246  | -0.00851 | -0.00402 |
| 4                                         | A <sub>1</sub> /D <sub>0</sub> | 2.73907  | 0.84170  | 0.86957  | -0.35467 | 0.01816  | 0.00000 | -0.21320 | -3.10455  | -0.39277 | 0.96428  |
|                                           | B <sub>0</sub> /D <sub>0</sub> | -0.00141 | 0.00554  | -0.00253 | 0.00025  | 0.00574  | 0.00000 | 0.00314  | -0.00128  | -0.00715 | -0.00402 |
| 5                                         | A <sub>1</sub> /D <sub>0</sub> | 2.95470  | 1.35757  | 1.16430  | -0.07646 | -0.18165 | 0.00000 | -0.36747 | -2.43808  | -0.39277 | 0.96428  |
|                                           | B <sub>0</sub> /D <sub>0</sub> | -0.00183 | 0.00527  | -0.00238 | -0.00049 | 0.00561  | 0.00000 | 0.00122  | -0.00055  | -0.00715 | -0.00402 |
| 6                                         | A <sub>1</sub> /D <sub>0</sub> | 2.95470  | 1.68305  | 1.37300  | 0.12663  | -0.26741 | 0.00000 | -0.43531 | -1.95197  | 0.39277  | 0.96428  |
|                                           | B <sub>0</sub> /D <sub>0</sub> | -0.00156 | 0.00544  | -0.00127 | -0.00193 | 0.00564  | 0.00000 | -0.00132 | 0.00054   | -0.00543 | -0.00402 |



**Table S3.**  $L_z$  and  $\Delta_{JL}$  values of [Dy(TPP)12C4]Cl and [Dy(TPP)aza12C4]Cl with  $J_z = 11/2, 13/2,$  and  $15/2$ .

| <b>[Dy(TPP)(12C4)]Cl</b>    |               |                                       |                        |               |                                       |                        |               |                                       |                        |
|-----------------------------|---------------|---------------------------------------|------------------------|---------------|---------------------------------------|------------------------|---------------|---------------------------------------|------------------------|
| $J_z$                       | <b>B(0,0)</b> |                                       |                        | <b>Q(0,0)</b> |                                       |                        | <b>Q(1,0)</b> |                                       |                        |
|                             | $L_z (\hbar)$ | $\Delta_{JL}$<br>( $\text{cm}^{-1}$ ) | $\Sigma\text{Error}^2$ | $L_z (\hbar)$ | $\Delta_{JL}$<br>( $\text{cm}^{-1}$ ) | $\Sigma\text{Error}^2$ | $L_z (\hbar)$ | $\Delta_{JL}$<br>( $\text{cm}^{-1}$ ) | $\Sigma\text{Error}^2$ |
| $11/2$                      | 1.18          | -3.60                                 | 11.35                  | 3.58          | -0.45                                 | 0.10                   | 2.30          | -0.29                                 | 0.16                   |
| $13/2$                      | 0.84          | -3.19                                 | 1.1                    | 3.53          | -0.39                                 | 0.01                   | 2.26          | -0.26                                 | 0.13                   |
| <b>[Dy(TPP)(aza12C4)]Cl</b> |               |                                       |                        |               |                                       |                        |               |                                       |                        |
| $J_z$                       | <b>B(0,0)</b> |                                       |                        | <b>Q(0,0)</b> |                                       |                        | <b>Q(1,0)</b> |                                       |                        |
|                             | $L_z (\hbar)$ | $\Delta_{JL}$<br>( $\text{cm}^{-1}$ ) | $\Sigma\text{Error}^2$ | $L_z (\hbar)$ | $\Delta_{JL}$<br>( $\text{cm}^{-1}$ ) | $\Sigma\text{Error}^2$ | $L_z (\hbar)$ | $\Delta_{JL}$<br>( $\text{cm}^{-1}$ ) | $\Sigma\text{Error}^2$ |
| $11/2$                      | 1.28          | -5.25                                 | 16.72                  | 4.23          | -4.04                                 | 7.57                   | 1.54          | -2.21                                 | 3.18                   |
| $13/2$                      | 0.76          | -4.66                                 | 0.51                   | 3.82          | -3.58                                 | 0.04                   | 1.32          | -1.96                                 | 0.26                   |
| $15/2$                      | 0.28          | -4.20                                 | 0.61                   | 3.42          | -3.23                                 | 5.89                   | 1.10          | -1.76                                 | 1.47                   |

### Computational Chemistry Calculation

**Table S4.** Details of *ab initio* calculations

| <b>Basis Set 1</b>          | <b>Basis Set 2</b>          |
|-----------------------------|-----------------------------|
| Dy = ANO-RCC...9s8p6d4f3g2h | Dy = ANO-RCC...8s7p5d3f2g1h |
| O = ANO-RCC...3s2p1d        | O = ANO-RCC...3s2p1d        |
| N = ANO-RCC...3s2p1d        | N = ANO-RCC...3s2p1d        |
| C = ANO-RCC...2s1p          | C = ANO-RCC...2s1p          |
| H = ANO-RCC...1s            | H = ANO-RCC...1s            |

**Table S5.** Dipole transition strengths for [Dy(TPP)(12C4)]<sup>+</sup> obtained from CASSCF/RASSI/single\_aniso calculations using Basis Set 1.

| From | To  | Oscillator Strength   | Einstein Coefficient (sec <sup>-1</sup> ) |                      |                | Total A (sec <sup>-1</sup> ) |
|------|-----|-----------------------|-------------------------------------------|----------------------|----------------|------------------------------|
|      |     |                       | A <sub>x</sub>                            | A <sub>y</sub>       | A <sub>z</sub> |                              |
| 1    | 282 | 1.41×10 <sup>-2</sup> | 4.76×10 <sup>6</sup>                      | 4.76×10 <sup>6</sup> | 0.00           | 9.52×10 <sup>6</sup>         |
| 2    | 281 | 1.41×10 <sup>-2</sup> | 4.76×10 <sup>6</sup>                      | 4.76×10 <sup>6</sup> | 0.00           | 9.52×10 <sup>6</sup>         |
| 1    | 284 | 1.40×10 <sup>-2</sup> | 4.72×10 <sup>6</sup>                      | 4.72×10 <sup>6</sup> | 0.00           | 9.45×10 <sup>6</sup>         |
| 2    | 283 | 1.40×10 <sup>-2</sup> | 4.72×10 <sup>6</sup>                      | 4.72×10 <sup>6</sup> | 0.00           | 9.45×10 <sup>6</sup>         |
| 1    | 813 | 2.84                  | 2.20×10 <sup>9</sup>                      | 2.03×10 <sup>9</sup> | 0.00           | 4.24×10 <sup>9</sup>         |
| 2    | 814 | 2.84                  | 2.20×10 <sup>9</sup>                      | 2.03×10 <sup>9</sup> | 0.00           | 4.24×10 <sup>9</sup>         |
| 1    | 817 | 2.44                  | 1.76×10 <sup>9</sup>                      | 1.88×10 <sup>9</sup> | 0.00           | 3.64×10 <sup>9</sup>         |
| 2    | 818 | 2.44                  | 1.76×10 <sup>9</sup>                      | 1.88×10 <sup>9</sup> | 0.00           | 3.64×10 <sup>9</sup>         |
| 3    | 285 | 1.41×10 <sup>-2</sup> | 4.75×10 <sup>6</sup>                      | 4.75×10 <sup>6</sup> | 0.00           | 9.51×10 <sup>6</sup>         |
| 4    | 286 | 1.41×10 <sup>-2</sup> | 4.75×10 <sup>6</sup>                      | 4.75×10 <sup>6</sup> | 0.00           | 9.51×10 <sup>6</sup>         |
| 3    | 287 | 1.42×10 <sup>-2</sup> | 4.78×10 <sup>6</sup>                      | 4.78×10 <sup>6</sup> | 0.00           | 9.56×10 <sup>6</sup>         |
| 4    | 288 | 1.42×10 <sup>-2</sup> | 4.78×10 <sup>6</sup>                      | 4.78×10 <sup>6</sup> | 0.00           | 9.56×10 <sup>6</sup>         |
| 3    | 824 | 1.94                  | 1.53×10 <sup>9</sup>                      | 1.36×10 <sup>9</sup> | 0.00           | 2.90×10 <sup>9</sup>         |
| 4    | 823 | 1.94                  | 1.53×10 <sup>9</sup>                      | 1.36×10 <sup>9</sup> | 0.00           | 2.90×10 <sup>9</sup>         |
| 3    | 826 | 2.98                  | 2.11×10 <sup>9</sup>                      | 2.33×10 <sup>9</sup> | 0.00           | 4.44×10 <sup>9</sup>         |
| 4    | 825 | 2.98                  | 2.11×10 <sup>9</sup>                      | 2.33×10 <sup>9</sup> | 0.00           | 4.44×10 <sup>9</sup>         |
| 5    | 277 | 7.95×10 <sup>-3</sup> | 2.66×10 <sup>6</sup>                      | 2.66×10 <sup>6</sup> | 0.00           | 5.32×10 <sup>6</sup>         |
| 6    | 278 | 7.95×10 <sup>-3</sup> | 2.66×10 <sup>6</sup>                      | 2.66×10 <sup>6</sup> | 0.00           | 5.32×10 <sup>6</sup>         |
| 5    | 279 | 7.55×10 <sup>-3</sup> | 2.53×10 <sup>6</sup>                      | 2.53×10 <sup>6</sup> | 0.00           | 5.05×10 <sup>6</sup>         |
| 6    | 280 | 7.55×10 <sup>-3</sup> | 2.53×10 <sup>6</sup>                      | 2.53×10 <sup>6</sup> | 0.00           | 5.05×10 <sup>6</sup>         |
| 5    | 820 | 2.86                  | 2.29×10 <sup>9</sup>                      | 1.98×10 <sup>9</sup> | 0.00           | 4.27×10 <sup>9</sup>         |
| 6    | 819 | 2.86                  | 2.29×10 <sup>9</sup>                      | 1.98×10 <sup>9</sup> | 0.00           | 4.27×10 <sup>9</sup>         |
| 5    | 822 | 1.79                  | 1.20×10 <sup>9</sup>                      | 1.47×10 <sup>9</sup> | 0.00           | 2.67×10 <sup>9</sup>         |
| 6    | 821 | 1.79                  | 1.20×10 <sup>9</sup>                      | 1.47×10 <sup>9</sup> | 0.00           | 2.67×10 <sup>9</sup>         |
| 7    | 289 | 1.39×10 <sup>-2</sup> | 4.71×10 <sup>6</sup>                      | 4.71×10 <sup>6</sup> | 0.00           | 9.42×10 <sup>6</sup>         |
| 8    | 290 | 1.39×10 <sup>-2</sup> | 4.71×10 <sup>6</sup>                      | 4.71×10 <sup>6</sup> | 0.00           | 9.42×10 <sup>6</sup>         |
| 7    | 292 | 1.41×10 <sup>-2</sup> | 4.75×10 <sup>6</sup>                      | 4.75×10 <sup>6</sup> | 0.00           | 9.50×10 <sup>6</sup>         |
| 8    | 291 | 1.41×10 <sup>-2</sup> | 4.75×10 <sup>6</sup>                      | 4.75×10 <sup>6</sup> | 0.00           | 9.50×10 <sup>6</sup>         |
| 7    | 828 | 2.71                  | 2.39×10 <sup>9</sup>                      | 1.65×10 <sup>9</sup> | 0.00           | 4.05×10 <sup>9</sup>         |
| 8    | 827 | 2.71                  | 2.39×10 <sup>9</sup>                      | 1.65×10 <sup>9</sup> | 0.00           | 4.05×10 <sup>9</sup>         |
| 7    | 830 | 2.70                  | 1.64×10 <sup>9</sup>                      | 2.38×10 <sup>9</sup> | 0.00           | 4.02×10 <sup>9</sup>         |
| 8    | 829 | 2.70                  | 1.64×10 <sup>9</sup>                      | 2.38×10 <sup>9</sup> | 0.00           | 4.02×10 <sup>9</sup>         |
| 9    | 294 | 8.07×10 <sup>-3</sup> | 2.73×10 <sup>6</sup>                      | 2.73×10 <sup>6</sup> | 0.00           | 5.45×10 <sup>6</sup>         |
| 10   | 293 | 8.07×10 <sup>-3</sup> | 2.73×10 <sup>6</sup>                      | 2.73×10 <sup>6</sup> | 0.00           | 5.45×10 <sup>6</sup>         |
| 9    | 295 | 7.81×10 <sup>-3</sup> | 2.64×10 <sup>6</sup>                      | 2.64×10 <sup>6</sup> | 0.00           | 5.28×10 <sup>6</sup>         |
| 10   | 296 | 7.81×10 <sup>-3</sup> | 2.64×10 <sup>6</sup>                      | 2.64×10 <sup>6</sup> | 0.00           | 5.28×10 <sup>6</sup>         |
| 9    | 832 | 2.62                  | 2.48×10 <sup>9</sup>                      | 1.43×10 <sup>9</sup> | 0.00           | 3.91×10 <sup>9</sup>         |
| 10   | 831 | 2.62                  | 2.48×10 <sup>9</sup>                      | 1.43×10 <sup>9</sup> | 0.00           | 3.91×10 <sup>9</sup>         |
| 9    | 834 | 2.73                  | 1.50×10 <sup>9</sup>                      | 2.57×10 <sup>9</sup> | 0.00           | 4.07×10 <sup>9</sup>         |
| 10   | 833 | 2.73                  | 1.50×10 <sup>9</sup>                      | 2.57×10 <sup>9</sup> | 0.00           | 4.07×10 <sup>9</sup>         |
| 11   | 301 | 1.49×10 <sup>-2</sup> | 5.08×10 <sup>6</sup>                      | 5.06×10 <sup>6</sup> | 0.00           | 1.01×10 <sup>7</sup>         |
| 12   | 302 | 1.49×10 <sup>-2</sup> | 5.08×10 <sup>6</sup>                      | 5.06×10 <sup>6</sup> | 0.00           | 1.01×10 <sup>7</sup>         |
| 11   | 303 | 1.48×10 <sup>-2</sup> | 5.01×10 <sup>6</sup>                      | 5.03×10 <sup>6</sup> | 0.00           | 1.00×10 <sup>7</sup>         |
| 12   | 304 | 1.48×10 <sup>-2</sup> | 5.01×10 <sup>6</sup>                      | 5.03×10 <sup>6</sup> | 0.00           | 1.00×10 <sup>7</sup>         |
| 11   | 836 | 3.02                  | 2.34×10 <sup>9</sup>                      | 2.17×10 <sup>9</sup> | 0.00           | 4.51×10 <sup>9</sup>         |
| 12   | 835 | 3.02                  | 2.34×10 <sup>9</sup>                      | 2.17×10 <sup>9</sup> | 0.00           | 4.51×10 <sup>9</sup>         |

|    |     |                       |                    |                    |      |                    |
|----|-----|-----------------------|--------------------|--------------------|------|--------------------|
| 11 | 837 | 3.00                  | $2.16 \times 10^9$ | $2.32 \times 10^9$ | 0.00 | $4.47 \times 10^9$ |
| 12 | 838 | 3.00                  | $2.16 \times 10^9$ | $2.32 \times 10^9$ | 0.00 | $4.47 \times 10^9$ |
| 13 | 297 | $1.50 \times 10^{-2}$ | $5.05 \times 10^6$ | $5.09 \times 10^6$ | 0.00 | $1.01 \times 10^7$ |
| 14 | 298 | $1.50 \times 10^{-2}$ | $5.05 \times 10^6$ | $5.09 \times 10^6$ | 0.00 | $1.01 \times 10^7$ |
| 13 | 299 | $1.49 \times 10^{-2}$ | $5.04 \times 10^6$ | $5.00 \times 10^6$ | 0.00 | $1.00 \times 10^7$ |
| 14 | 300 | $1.49 \times 10^{-2}$ | $5.04 \times 10^6$ | $5.00 \times 10^6$ | 0.00 | $1.00 \times 10^7$ |
| 13 | 839 | 2.98                  | $2.77 \times 10^9$ | $1.68 \times 10^9$ | 0.00 | $4.45 \times 10^9$ |
| 14 | 840 | 2.98                  | $2.77 \times 10^9$ | $1.68 \times 10^9$ | 0.00 | $4.45 \times 10^9$ |
| 13 | 842 | 2.97                  | $1.69 \times 10^9$ | $2.75 \times 10^9$ | 0.00 | $4.44 \times 10^9$ |
| 14 | 841 | 2.97                  | $1.69 \times 10^9$ | $2.75 \times 10^9$ | 0.00 | $4.44 \times 10^9$ |
| 15 | 274 | $1.52 \times 10^{-2}$ | $4.97 \times 10^6$ | $4.97 \times 10^6$ | 0.00 | $9.95 \times 10^6$ |
| 16 | 273 | $1.52 \times 10^{-2}$ | $4.97 \times 10^6$ | $4.97 \times 10^6$ | 0.00 | $9.95 \times 10^6$ |
| 15 | 276 | $1.51 \times 10^{-3}$ | $4.95 \times 10^6$ | $4.95 \times 10^6$ | 0.00 | $9.91 \times 10^6$ |
| 16 | 275 | $1.51 \times 10^{-3}$ | $4.95 \times 10^6$ | $4.95 \times 10^6$ | 0.00 | $9.91 \times 10^6$ |
| 15 | 843 | 2.98                  | $2.79 \times 10^9$ | $1.66 \times 10^9$ | 0.00 | $4.45 \times 10^9$ |
| 16 | 844 | 2.98                  | $2.79 \times 10^9$ | $1.66 \times 10^9$ | 0.00 | $4.45 \times 10^9$ |
| 15 | 845 | 2.99                  | $1.66 \times 10^9$ | $2.81 \times 10^9$ | 0.00 | $4.47 \times 10^9$ |
| 16 | 846 | 2.99                  | $1.66 \times 10^9$ | $2.81 \times 10^9$ | 0.00 | $4.47 \times 10^9$ |

**Table S6.** Dipole transition strengths for  $[\text{Dy}(\text{TPP})(\text{aza12C4})]^+$  obtained from CASSCF/RASSI/single\_aniso calculations using Basis Set 1.

| From | To  | Oscillator Strength   | Einstein Coefficient ( $\text{sec}^{-1}$ ) |                    |                    | Total A ( $\text{sec}^{-1}$ ) |
|------|-----|-----------------------|--------------------------------------------|--------------------|--------------------|-------------------------------|
|      |     |                       | $A_x$                                      | $A_y$              | $A_z$              |                               |
| 1    | 265 | $2.95 \times 10^{-3}$ | $1.78 \times 10^6$                         | $1.79 \times 10^5$ | $2.17 \times 10^1$ | $1.96 \times 10^6$            |
| 2    | 266 | $2.95 \times 10^{-3}$ | $1.78 \times 10^6$                         | $1.79 \times 10^5$ | $2.17 \times 10^1$ | $1.96 \times 10^6$            |
| 1    | 283 | $5.35 \times 10^{-3}$ | $1.08 \times 10^6$                         | $2.51 \times 10^6$ | $4.33 \times 10^1$ | $3.59 \times 10^6$            |
| 2    | 284 | $5.35 \times 10^{-3}$ | $1.08 \times 10^6$                         | $2.51 \times 10^6$ | $4.33 \times 10^1$ | $3.59 \times 10^6$            |
| 1    | 805 | 2.11                  | $1.60 \times 10^9$                         | $1.49 \times 10^9$ | $8.97 \times 10^3$ | $3.09 \times 10^9$            |
| 2    | 806 | 2.11                  | $1.60 \times 10^9$                         | $1.49 \times 10^9$ | $8.97 \times 10^3$ | $3.09 \times 10^9$            |
| 1    | 819 | 1.90                  | $1.35 \times 10^9$                         | $1.46 \times 10^9$ | $1.42 \times 10^4$ | $2.81 \times 10^9$            |
| 2    | 820 | 1.90                  | $1.35 \times 10^9$                         | $1.46 \times 10^9$ | $1.42 \times 10^4$ | $2.81 \times 10^9$            |
| 3    | 271 | $2.30 \times 10^{-3}$ | $1.35 \times 10^6$                         | $1.80 \times 10^5$ | $1.52 \times 10^1$ | $1.53 \times 10^6$            |
| 4    | 272 | $2.30 \times 10^{-3}$ | $1.35 \times 10^6$                         | $1.80 \times 10^5$ | $1.52 \times 10^1$ | $1.53 \times 10^6$            |
| 3    | 285 | $6.70 \times 10^{-3}$ | $1.28 \times 10^6$                         | $3.22 \times 10^6$ | $3.66 \times 10^1$ | $4.49 \times 10^6$            |
| 4    | 286 | $6.70 \times 10^{-3}$ | $1.28 \times 10^6$                         | $3.22 \times 10^6$ | $3.66 \times 10^1$ | $4.49 \times 10^6$            |
| 3    | 807 | 2.90                  | $2.24 \times 10^9$                         | $2.00 \times 10^9$ | $1.24 \times 10^4$ | $4.23 \times 10^9$            |
| 4    | 808 | 2.90                  | $2.24 \times 10^9$                         | $2.00 \times 10^9$ | $1.24 \times 10^4$ | $4.23 \times 10^9$            |
| 3    | 821 | 1.42                  | $9.86 \times 10^8$                         | $1.12 \times 10^9$ | $1.07 \times 10^1$ | $2.11 \times 10^9$            |
| 4    | 822 | 1.42                  | $9.86 \times 10^8$                         | $1.12 \times 10^9$ | $1.07 \times 10^1$ | $2.11 \times 10^9$            |
| 5    | 276 | $3.26 \times 10^{-3}$ | $1.92 \times 10^6$                         | $2.50 \times 10^5$ | $1.62 \times 10^1$ | $2.17 \times 10^6$            |
| 6    | 275 | $3.26 \times 10^{-3}$ | $1.92 \times 10^6$                         | $2.50 \times 10^5$ | $1.62 \times 10^1$ | $2.17 \times 10^6$            |
| 5    | 288 | $4.07 \times 10^{-3}$ | $7.87 \times 10^5$                         | $1.95 \times 10^6$ | $2.29 \times 10^1$ | $2.73 \times 10^6$            |
| 6    | 287 | $4.07 \times 10^{-3}$ | $7.87 \times 10^5$                         | $1.95 \times 10^6$ | $2.29 \times 10^1$ | $2.73 \times 10^6$            |
| 5    | 810 | 2.33                  | $1.80 \times 10^9$                         | $1.60 \times 10^9$ | $9.85 \times 10^3$ | $3.40 \times 10^9$            |
| 6    | 809 | 2.33                  | $1.80 \times 10^9$                         | $1.60 \times 10^9$ | $9.85 \times 10^3$ | $3.40 \times 10^9$            |
| 5    | 826 | 2.34                  | $1.65 \times 10^9$                         | $1.81 \times 10^9$ | $1.74 \times 10^4$ | $3.47 \times 10^9$            |
| 6    | 825 | 2.34                  | $1.65 \times 10^9$                         | $1.81 \times 10^9$ | $1.74 \times 10^4$ | $3.47 \times 10^9$            |

|    |     |                       |                    |                    |                    |                    |
|----|-----|-----------------------|--------------------|--------------------|--------------------|--------------------|
| 7  | 280 | $2.65 \times 10^{-3}$ | $1.56 \times 10^6$ | $2.07 \times 10^5$ | $1.13 \times 10^1$ | $1.76 \times 10^6$ |
| 8  | 279 | $2.65 \times 10^{-3}$ | $1.56 \times 10^6$ | $2.07 \times 10^5$ | $1.13 \times 10^1$ | $1.76 \times 10^6$ |
| 7  | 292 | $2.30 \times 10^{-3}$ | $4.22 \times 10^5$ | $1.12 \times 10^6$ | $1.23 \times 10^1$ | $1.54 \times 10^6$ |
| 8  | 291 | $2.30 \times 10^{-3}$ | $4.22 \times 10^5$ | $1.12 \times 10^6$ | $1.23 \times 10^1$ | $1.54 \times 10^6$ |
| 7  | 812 | 2.19                  | $1.68 \times 10^9$ | $1.52 \times 10^9$ | $9.04 \times 10^3$ | $3.20 \times 10^9$ |
| 8  | 811 | 2.19                  | $1.68 \times 10^9$ | $1.52 \times 10^9$ | $9.04 \times 10^3$ | $3.20 \times 10^9$ |
| 7  | 828 | 2.01                  | $1.41 \times 10^9$ | $1.56 \times 10^9$ | $1.53 \times 10^4$ | $2.98 \times 10^9$ |
| 8  | 827 | 2.01                  | $1.41 \times 10^9$ | $1.56 \times 10^9$ | $1.53 \times 10^4$ | $2.98 \times 10^9$ |
| 9  | 281 | $3.42 \times 10^{-3}$ | $2.02 \times 10^6$ | $2.50 \times 10^5$ | $8.16 \times 10^0$ | $2.27 \times 10^6$ |
| 10 | 282 | $3.42 \times 10^{-3}$ | $2.02 \times 10^6$ | $2.50 \times 10^5$ | $8.16 \times 10^0$ | $2.27 \times 10^6$ |
| 9  | 295 | $6.00 \times 10^{-3}$ | $1.16 \times 10^6$ | $2.86 \times 10^6$ | $2.81 \times 10^1$ | $4.03 \times 10^6$ |
| 10 | 296 | $6.00 \times 10^{-3}$ | $1.16 \times 10^6$ | $2.86 \times 10^6$ | $2.81 \times 10^1$ | $4.03 \times 10^6$ |
| 9  | 813 | 2.83                  | $2.17 \times 10^9$ | $1.96 \times 10^9$ | $1.15 \times 10^4$ | $4.13 \times 10^9$ |
| 10 | 814 | 2.83                  | $2.17 \times 10^9$ | $1.96 \times 10^9$ | $1.15 \times 10^4$ | $4.13 \times 10^9$ |
| 9  | 831 | 2.90                  | $2.04 \times 10^9$ | $2.25 \times 10^9$ | $2.19 \times 10^4$ | $4.29 \times 10^9$ |
| 10 | 832 | 2.90                  | $2.04 \times 10^9$ | $2.25 \times 10^9$ | $2.19 \times 10^4$ | $4.29 \times 10^9$ |
| 11 | 289 | $3.22 \times 10^{-3}$ | $1.93 \times 10^6$ | $2.11 \times 10^5$ | $1.72 \times 10^1$ | $2.14 \times 10^6$ |
| 12 | 290 | $3.22 \times 10^{-3}$ | $1.93 \times 10^6$ | $2.11 \times 10^5$ | $1.72 \times 10^1$ | $2.14 \times 10^6$ |
| 11 | 300 | $7.20 \times 10^{-3}$ | $1.41 \times 10^6$ | $3.42 \times 10^6$ | $3.96 \times 10^1$ | $4.83 \times 10^6$ |
| 12 | 299 | $7.20 \times 10^{-3}$ | $1.41 \times 10^6$ | $3.42 \times 10^6$ | $3.96 \times 10^1$ | $4.83 \times 10^6$ |
| 11 | 815 | 2.99                  | $2.31 \times 10^9$ | $2.07 \times 10^9$ | $1.26 \times 10^4$ | $4.38 \times 10^9$ |
| 12 | 816 | 2.99                  | $2.31 \times 10^9$ | $2.07 \times 10^9$ | $1.26 \times 10^4$ | $4.38 \times 10^9$ |
| 11 | 840 | 3.04                  | $2.14 \times 10^9$ | $2.36 \times 10^9$ | $2.30 \times 10^4$ | $4.50 \times 10^9$ |
| 12 | 839 | 3.04                  | $2.14 \times 10^9$ | $2.36 \times 10^9$ | $2.30 \times 10^4$ | $4.50 \times 10^9$ |
| 13 | 291 | $2.06 \times 10^{-3}$ | $1.22 \times 10^6$ | $1.46 \times 10^5$ | $1.03 \times 10^1$ | $1.37 \times 10^6$ |
| 14 | 292 | $2.06 \times 10^{-3}$ | $1.22 \times 10^6$ | $1.46 \times 10^5$ | $1.03 \times 10^1$ | $1.37 \times 10^6$ |
| 13 | 294 | $1.32 \times 10^{-3}$ | $7.64 \times 10^5$ | $1.17 \times 10^5$ | $7.45 \times 10^0$ | $8.80 \times 10^5$ |
| 14 | 293 | $1.32 \times 10^{-3}$ | $7.64 \times 10^5$ | $1.17 \times 10^5$ | $7.45 \times 10^0$ | $8.80 \times 10^5$ |
| 13 | 817 | 2.80                  | $2.14 \times 10^9$ | $1.95 \times 10^9$ | $1.15 \times 10^4$ | $4.09 \times 10^9$ |
| 14 | 818 | 2.80                  | $2.14 \times 10^9$ | $1.95 \times 10^9$ | $1.15 \times 10^4$ | $4.09 \times 10^9$ |
| 13 | 843 | 3.07                  | $2.17 \times 10^9$ | $2.37 \times 10^9$ | $2.31 \times 10^4$ | $4.54 \times 10^9$ |
| 14 | 844 | 3.07                  | $2.17 \times 10^9$ | $2.37 \times 10^9$ | $2.31 \times 10^4$ | $4.54 \times 10^9$ |
| 15 | 297 | $3.21 \times 10^{-3}$ | $1.90 \times 10^6$ | $2.33 \times 10^5$ | $1.20 \times 10^1$ | $2.13 \times 10^6$ |
| 16 | 298 | $3.21 \times 10^{-3}$ | $1.90 \times 10^6$ | $2.33 \times 10^5$ | $1.20 \times 10^1$ | $2.13 \times 10^6$ |
| 15 | 303 | $7.31 \times 10^{-3}$ | $1.42 \times 10^6$ | $3.49 \times 10^6$ | $3.98 \times 10^1$ | $4.91 \times 10^6$ |
| 16 | 304 | $7.31 \times 10^{-3}$ | $1.42 \times 10^6$ | $3.49 \times 10^6$ | $3.98 \times 10^1$ | $4.91 \times 10^6$ |
| 15 | 821 | 1.53                  | $1.18 \times 10^9$ | $1.06 \times 10^9$ | $6.39 \times 10^3$ | $2.24 \times 10^9$ |
| 16 | 822 | 1.53                  | $1.18 \times 10^9$ | $1.06 \times 10^9$ | $6.39 \times 10^3$ | $2.24 \times 10^9$ |
| 15 | 846 | 3.08                  | $2.17 \times 10^9$ | $2.39 \times 10^9$ | $2.32 \times 10^4$ | $4.56 \times 10^9$ |
| 16 | 845 | 3.08                  | $2.17 \times 10^9$ | $2.39 \times 10^9$ | $2.32 \times 10^4$ | $4.56 \times 10^9$ |

**Table S7.** The calculated transition energy, orbital and spin angular momenta of the ground doublet and the excited doublet SO states for  $[\text{Dy}(\text{TPP})(12\text{C4})]^+$ , generated from CAS(11,13) calculation with basis set 1.

| Doublet | Spin-orbit State | Energy ( $\text{cm}^{-1}$ ) | initial doublet $\rightarrow$<br>final doublet | $ L_z $ | $ S_z $ | $ J_z $<br>$=  L_z+S_z $ | Change in<br>$ J_z $ from<br>the initial<br>doublet                                                                    | Primal<br>$ J_z\rangle$ | $\Delta_{\text{JL}}$ |
|---------|------------------|-----------------------------|------------------------------------------------|---------|---------|--------------------------|------------------------------------------------------------------------------------------------------------------------|-------------------------|----------------------|
| 1       | 1, 2             | 0.000                       |                                                | 2.91    | 1.48    | 4.39                     | 0.80<br>$ \pm 11/2\rangle$<br>, 0.13<br>$ \pm 3/2\rangle$                                                              |                         |                      |
| 2       | 3, 4             | 17.387                      |                                                | 1.27    | 0.62    | 1.89                     | 0.57<br>$ \pm 9/2\rangle$ ,<br>0.22<br>$ \pm 11/2\rangle$<br>, 0.21<br>$ \pm 1/2\rangle$                               |                         |                      |
| 3       | 5, 6             | 47.144                      |                                                | 1.83    | 0.96    | 2.79                     | 0.42<br>$ \pm 13/2\rangle$<br>, 0.35<br>$ \pm 5/2\rangle$ ,<br>0.12<br>$ \pm 11/2\rangle$<br>0.10<br>$ \pm 3/2\rangle$ |                         |                      |
| 4       | 7, 8             | 65.885                      |                                                | 0.32    | 0.17    | 0.49                     | 0.60<br>$ \pm 7/2\rangle$ ,<br>0.35<br>$ \pm 9/2\rangle$                                                               |                         |                      |
| 5       | 9,10             | 78.945                      |                                                | 2.41    | 1.25    | 3.66                     | 0.56<br>$ \pm 13/2\rangle$<br>, 0.22<br>$ \pm 5/2\rangle$ ,<br>0.17<br>$ \pm 3/2\rangle$                               |                         |                      |
| 6       | 11,12            | 203.961                     |                                                | 0.06    | 0.01    | 0.07                     | 0.60<br>$ \pm 3/2\rangle$ ,<br>0.36<br>$ \pm 5/2\rangle$                                                               |                         |                      |
| 7       | 13,14            | 217.607                     |                                                | 0.07    | 0.02    | 0.09                     | 0.75<br>$ \pm 1/2\rangle$ ,<br>0.17<br>$ \pm 7/2\rangle$                                                               |                         |                      |
| 8       | 15, 16           | 340.158                     |                                                | 4.98    | 2.50    | 7.48                     | 1.00<br>$ \pm 15/2\rangle$                                                                                             |                         |                      |
| 137     | 273, 274         | 31696.829                   | 8 $\rightarrow$ 137                            | 9.53    | 2.50    | 12.03                    | +4.55                                                                                                                  |                         | 5.83                 |
| 138     | 275, 276         | 31708.494                   | 8 $\rightarrow$ 138                            | 0.41    | 2.49    | 2.90                     | -4.58                                                                                                                  |                         |                      |
| 139     | 277, 278         | 31724.052                   | 3 $\rightarrow$ 139                            | 0.29    | 2.14    | 1.85                     | -0.94                                                                                                                  |                         | -4.60                |
| 140     | 279, 280         | 31733.254                   | 3 $\rightarrow$ 140                            | 8.84    | 2.14    | 10.98                    | +8.19                                                                                                                  |                         |                      |
| 141     | 281, 282         | 31769.706                   | 1 $\rightarrow$ 141                            | 1.06    | 1.72    | 0.66                     | -3.73                                                                                                                  |                         | -5.55                |
| 142     | 283, 284         | 31780.817                   | 1 $\rightarrow$ 142                            | 8.07    | 1.74    | 9.81                     | +5.42                                                                                                                  |                         |                      |
| 143     | 285, 286         | 31811.562                   | 2 $\rightarrow$ 143                            | 2.29    | 1.10    | 1.20                     | -0.69                                                                                                                  |                         | -2.85                |
| 144     | 287, 288         | 31817.267                   | 2 $\rightarrow$ 144                            | 6.76    | 1.09    | 7.85                     | +5.96                                                                                                                  |                         |                      |
| 145     | 289, 290         | 31882.624                   | 4 $\rightarrow$ 145                            | 3.39    | 0.51    | 2.88                     | 2.39                                                                                                                   |                         | 0.75                 |
| 146     | 291, 292         | 31884.116                   | 4 $\rightarrow$ 146                            | 5.86    | 0.62    | 6.48                     | 5.99                                                                                                                   |                         |                      |
| 147     | 293, 294         | 31911.725                   | 5 $\rightarrow$ 147                            | 4.07    | 0.18    | 3.89                     | 0.23                                                                                                                   |                         | 0.12                 |
| 148     | 295, 296         | 31911.958                   | 5 $\rightarrow$ 148                            | 5.14    | 0.27    | 5.41                     | 1.75                                                                                                                   |                         |                      |

|     |          |           |       |      |      |      |       |      |
|-----|----------|-----------|-------|------|------|------|-------|------|
| 149 | 297, 298 | 32037.810 | 7→149 | 4.47 | 0.04 | 4.43 | 4.34  | 0.09 |
| 150 | 299, 300 | 32037.984 | 7→150 | 4.32 | 0.05 | 4.27 | 4.18  |      |
| 151 | 301, 302 | 32057.291 | 6→151 | 4.46 | 0.04 | 4.42 | 4.35  | 0.19 |
| 152 | 303, 304 | 32057.667 | 6→152 | 4.29 | 0.07 | 4.22 | 4.15  |      |
| 407 | 813, 814 | 47287.937 | 1→407 | 2.64 | 1.40 | 4.04 | -0.35 |      |
| 409 | 817, 818 | 47298.759 | 1→409 | 1.20 | 0.61 | 1.81 | -2.58 |      |
| 412 | 823, 824 | 47314.291 | 2→412 | 2.13 | 1.12 | 3.25 | 1.36  |      |
| 413 | 825, 826 | 47322.772 | 2→413 | 3.88 | 1.92 | 5.80 | 3.91  |      |
| 410 | 819, 820 | 47305.244 | 3→410 | 0.04 | 0.02 | 0.06 | -2.73 |      |
| 411 | 821,822  | 47309.567 | 3→411 | 1.89 | 0.97 | 2.86 | 0.07  |      |
| 414 | 827, 828 | 47361.818 | 4→414 | 2.25 | 1.16 | 3.41 | 2.92  |      |
| 415 | 829, 830 | 47364.496 | 4→415 | 2.05 | 1.05 | 3.10 | 2.61  |      |
| 416 | 831, 832 | 47371.187 | 5→416 | 2.49 | 1.27 | 3.76 | 0.10  |      |
| 417 | 833, 834 | 47373.110 | 5→417 | 2.76 | 1.41 | 4.17 | 0.51  |      |
| 418 | 835, 836 | 47451.018 | 6→418 | 5.08 | 2.48 | 7.56 | 7.49  |      |
| 419 | 837, 838 | 47465.220 | 6→419 | 4.67 | 2.41 | 7.08 | 7.01  |      |
| 420 | 839, 840 | 47506.595 | 7→420 | 0.09 | 0.02 | 0.11 | 0.02  |      |
| 421 | 841, 842 | 47508.637 | 7→421 | 0.11 | 0.07 | 0.18 | 0.09  |      |
| 422 | 843, 844 | 47510.110 | 8→422 | 0.04 | 0.02 | 0.06 | -7.42 |      |
| 423 | 845, 846 | 47512.071 | 8→423 | 0.04 | 0.02 | 0.06 | -7.42 |      |

**Table S8.** The calculated transition energy, orbital and spin angular momenta of the ground doublet and the excited doublet SO states for  $[\text{Dy}(\text{TPP})(\text{aza}12\text{C}4)]^+$ , generated from CAS(11,13) calculation with basis set 1.

| Doublet | Spin-orbit State | Energy (cm <sup>-1</sup> ) | Transition (initial doublet → final doublet) | $ L_z $ | $ S_z $ | $ J_z  =  L_z + S_z $ | Change in $ J_z $ from the initial doublet | Primal $ J_z\rangle$                                     | $\Delta_{JL}$ |
|---------|------------------|----------------------------|----------------------------------------------|---------|---------|-----------------------|--------------------------------------------|----------------------------------------------------------|---------------|
| 1       | 1, 2             | 0.000                      |                                              | 4.52    | 2.28    | 6.80                  |                                            | 0.73<br>$ \pm 15/2\rangle$<br>0.11<br>$ \pm 11/2\rangle$ |               |
| 2       | 3, 4             | 34.333                     |                                              | 3.59    | 1.80    | 5.39                  |                                            | 0.47<br>$ \pm 13/2\rangle$<br>0.16<br>$ \pm 9/2\rangle$  |               |
| 3       | 5, 6             | 77.979                     |                                              | 2.93    | 1.46    | 4.39                  |                                            | 0.26<br>$ \pm 5/2\rangle$<br>0.21<br>$ \pm 13/2\rangle$  |               |
| 4       | 7, 8             | 118.022                    |                                              | 0.60    | 0.30    | 0.90                  |                                            | 0.30<br>$ \pm 11/2\rangle$<br>0.29<br>$ \pm 3/2\rangle$  |               |

|     |          |           |        |      |      |      |                                                 |
|-----|----------|-----------|--------|------|------|------|-------------------------------------------------|
| 5   | 9, 10    | 136.728   |        | 3.34 | 1.70 | 5.04 | 0.48<br>  $\pm 1/2$ )<br>0.18<br>  $\pm 3/2$ )  |
| 6   | 11, 12   | 250.440   |        | 4.66 | 2.34 | 7.00 | 0.25<br>  $\pm 9/2$ )<br>0.21<br>  $\pm 11/2$ ) |
| 7   | 13, 14   | 271.626   |        | 4.61 | 2.31 | 6.92 | 0.27<br>  $\pm 5/2$ )<br>0.20<br>  $\pm 3/2$ )  |
| 8   | 15, 16   | 295.791   |        | 4.81 | 2.41 | 7.22 | 0.31<br>  $\pm 7/2$ )<br>0.24<br>  $\pm 9/2$ )  |
| 133 | 265, 266 | 31568.164 | 1→133  | 4.33 | 2.22 | 6.55 | -0.25                                           |
| 142 | 283, 284 | 31723.432 | 1→142  | 4.57 | 2.24 | 6.81 | +0.01                                           |
| 136 | 271, 272 | 31600.921 | 2→136  | 3.23 | 1.44 | 4.67 | -0.72                                           |
| 143 | 285, 286 | 31753.950 | 2→143  | 3.67 | 1.83 | 5.50 | +0.11                                           |
| 138 | 275, 276 | 31647.656 | 3→138  | 3.00 | 1.47 | 4.47 | +0.08                                           |
| 144 | 287, 288 | 31800.946 | 3→144  | 2.96 | 1.49 | 4.45 | +0.06                                           |
| 140 | 279, 280 | 31687.834 | 4→140  | 0.87 | 0.44 | 1.31 | +0.41                                           |
| 147 | 293, 294 | 31844.224 | 4→147  | 2.70 | 1.37 | 4.07 | +3.17                                           |
| 141 | 281, 282 | 31711.602 | 5→141  | 3.34 | 1.81 | 5.15 | +0.11                                           |
| 148 | 295, 296 | 31865.315 | 5→148  | 3.77 | 1.82 | 5.59 | +0.55                                           |
| 145 | 289, 290 | 31821.021 | 6→145  | 4.64 | 2.30 | 6.94 | -0.06                                           |
| 150 | 299, 300 | 31972.750 | 6→150  | 4.74 | 2.40 | 7.14 | +0.14                                           |
| 146 | 291, 292 | 31838.455 | 7→146  | 3.31 | 1.67 | 4.98 | -1.94                                           |
| 151 | 301, 302 | 31996.565 | 7→151  | 4.69 | 2.35 | 7.04 | +0.12                                           |
| 149 | 297, 298 | 31872.145 | 8→149  | 4.99 | 2.34 | 7.33 | +0.11                                           |
| 152 | 303, 304 | 32025.218 | 8→152  | 4.51 | 2.42 | 6.93 | -0.29                                           |
| 403 | 805, 806 | 46814.924 | 1→ 403 | 4.48 | 2.26 | 6.74 | -0.06                                           |
| 410 | 819, 820 | 47091.223 | 1→ 410 | 4.30 | 2.17 | 6.47 | -0.33                                           |
| 404 | 807, 808 | 46846.210 | 2→ 404 | 3.70 | 1.86 | 5.56 | +0.17                                           |
| 411 | 821, 822 | 47119.802 | 2→ 411 | 3.45 | 1.73 | 5.18 | -0.12                                           |
| 405 | 809, 810 | 46894.888 | 3→ 405 | 3.01 | 1.49 | 4.50 | +0.11                                           |
| 413 | 825, 826 | 47168.618 | 3→ 413 | 2.96 | 1.47 | 4.43 | +0.04                                           |
| 406 | 811, 812 | 46935.309 | 4→ 406 | 2.22 | 1.10 | 3.32 | +2.42                                           |
| 414 | 827, 828 | 47207.877 | 4→ 414 | 0.94 | 0.47 | 1.41 | +0.51                                           |
| 407 | 813, 814 | 46960.985 | 5→ 407 | 3.50 | 1.79 | 5.29 | +0.25                                           |
| 416 | 831, 832 | 47234.112 | 5→ 416 | 3.63 | 1.86 | 5.49 | +0.45                                           |
| 408 | 815, 816 | 47067.566 | 6→ 408 | 4.74 | 2.38 | 7.12 | +0.12                                           |
| 420 | 839, 840 | 47340.180 | 6→ 420 | 4.78 | 2.40 | 7.18 | +0.18                                           |
| 409 | 817, 818 | 47086.990 | 7→ 409 | 4.54 | 2.28 | 6.82 | -0.10                                           |
| 422 | 843, 844 | 47362.923 | 7→ 422 | 4.72 | 2.37 | 7.09 | +0.17                                           |
| 411 | 821, 822 | 47119.802 | 8→ 411 | 3.45 | 1.73 | 5.18 | -2.04                                           |

---

|     |          |           |        |      |      |      |       |
|-----|----------|-----------|--------|------|------|------|-------|
| 423 | 845, 846 | 47394.809 | 8→ 423 | 4.85 | 2.44 | 7.29 | +0.07 |
|-----|----------|-----------|--------|------|------|------|-------|

---

Optimized structure of [Y(TPP)(12C4)]<sup>+</sup>

|   |               |               |               |  |  |  |  |
|---|---------------|---------------|---------------|--|--|--|--|
| Y | 0.            | 0.            | -0.068914911  |  |  |  |  |
| N | 1.4744075927  | 1.4732339496  | -1.1475352824 |  |  |  |  |
| N | -1.4732339496 | 1.4744075927  | -1.1475352824 |  |  |  |  |
| N | -1.4744075927 | -1.4732339496 | -1.1475352824 |  |  |  |  |
| N | 1.4732339496  | -1.4744075927 | -1.1475352824 |  |  |  |  |
| C | 3.4681721947  | -0.0013808993 | -1.3503275751 |  |  |  |  |
| C | 0.0013808993  | 3.4681721947  | -1.3503275751 |  |  |  |  |
| C | -3.4681721947 | 0.0013808993  | -1.3503275751 |  |  |  |  |
| C | -0.0013808993 | -3.4681721947 | -1.3503275751 |  |  |  |  |
| C | 2.8260482959  | 1.2558096718  | -1.3168433127 |  |  |  |  |
| C | -1.2558096718 | 2.8260482959  | -1.3168433127 |  |  |  |  |
| C | -2.8260482959 | -1.2558096718 | -1.3168433127 |  |  |  |  |
| C | 1.2558096718  | -2.8260482959 | -1.3168433127 |  |  |  |  |
| C | 1.2580597313  | 2.825047365   | -1.3168433127 |  |  |  |  |
| C | -2.825047365  | 1.2580597313  | -1.3168433127 |  |  |  |  |
| C | -1.2580597313 | -2.825047365  | -1.3168433127 |  |  |  |  |
| C | 2.825047365   | -1.2580597313 | -1.3168433127 |  |  |  |  |
| C | 3.4897559911  | 2.5227405505  | -1.5380279686 |  |  |  |  |
| C | 2.5255187365  | 3.4877459589  | -1.5380279686 |  |  |  |  |
| C | 3.4877459589  | -2.5255187365 | -1.5380279686 |  |  |  |  |
| C | 2.5227405505  | -3.4897559911 | -1.5380279686 |  |  |  |  |
| C | -2.5227405505 | 3.4897559911  | -1.5380279686 |  |  |  |  |
| C | -3.4877459589 | 2.5255187365  | -1.5380279686 |  |  |  |  |
| C | -2.5255187365 | -3.4877459589 | -1.5380279686 |  |  |  |  |
| C | -3.4897559911 | -2.5227405505 | -1.5380279686 |  |  |  |  |
| H | 4.5485048394  | 2.6493037787  | -1.7136156416 |  |  |  |  |
| H | 2.6529250346  | 4.5463936859  | -1.7136156416 |  |  |  |  |
| H | -2.6493037787 | 4.5485048394  | -1.7136156416 |  |  |  |  |



|   |               |               |               |
|---|---------------|---------------|---------------|
| H | -4.5463936859 | 2.6529250346  | -1.7136156416 |
| H | -4.5485048394 | -2.6493037787 | -1.7136156416 |
| H | -2.6529250346 | -4.5463936859 | -1.7136156416 |
| H | 2.6493037787  | -4.5485048394 | -1.7136156416 |
| H | 4.5463936859  | -2.6529250346 | -1.7136156416 |
| C | -0.0028712597 | -7.2112595958 | -0.6251447356 |
| C | -0.0030846574 | -7.7472144176 | -1.9142009807 |
| H | -0.0035133931 | -8.8239978814 | -2.0571176352 |
| C | -0.0027444932 | -6.8928813159 | -3.0190128163 |
| C | -0.0021933964 | -5.508784371  | -2.8363536119 |
| C | -0.0019745916 | -4.9592493283 | -1.5453312782 |
| C | -0.0023199798 | -5.8267025228 | -0.4436701746 |
| C | 0.0028712597  | 7.2112595958  | -0.6251447356 |
| C | 0.0030846574  | 7.7472144176  | -1.9142009807 |
| H | 0.0035133931  | 8.8239978814  | -2.0571176352 |
| C | 0.0027444932  | 6.8928813159  | -3.0190128163 |
| C | 0.0021933964  | 5.508784371   | -2.8363536119 |
| C | 0.0019745916  | 4.9592493283  | -1.5453312782 |
| C | 0.0023199798  | 5.8267025228  | -0.4436701746 |
| C | -7.2112595958 | 0.0028712597  | -0.6251447356 |
| C | -7.7472144176 | 0.0030846574  | -1.9142009807 |
| H | -8.8239978814 | 0.0035133931  | -2.0571176352 |
| C | -6.8928813159 | 0.0027444932  | -3.0190128163 |
| C | -5.508784371  | 0.0021933964  | -2.8363536119 |
| C | -4.9592493283 | 0.0019745916  | -1.5453312782 |
| C | -5.8267025228 | 0.0023199798  | -0.4436701746 |
| C | 7.2112595958  | -0.0028712597 | -0.6251447356 |
| C | 7.7472144176  | -0.0030846574 | -1.9142009807 |
| H | 8.8239978814  | -0.0035133931 | -2.0571176352 |
| C | 6.8928813159  | -0.0027444932 | -3.0190128163 |
| C | 5.508784371   | -0.0021933964 | -2.8363536119 |
| C | 4.9592493283  | -0.0019745916 | -1.5453312782 |
| C | 5.8267025228  | -0.0023199798 | -0.4436701746 |
| O | 0.000705663   | 1.7722950254  | 1.7044317204  |

|   |               |               |               |
|---|---------------|---------------|---------------|
| O | -1.7722950254 | 0.000705663   | 1.7044317204  |
| O | -0.000705663  | -1.7722950254 | 1.7044317204  |
| O | 1.7722950254  | -0.000705663  | 1.7044317204  |
| C | 2.3247113776  | 1.2211419884  | 2.1959681766  |
| C | 1.2229928309  | 2.3237382125  | 2.1959681766  |
| C | -1.2211419884 | 2.3247113776  | 2.1959681766  |
| C | -2.3237382125 | 1.2229928309  | 2.1959681766  |
| C | -2.3247113776 | -1.2211419884 | 2.1959681766  |
| C | -1.2229928309 | -2.3237382125 | 2.1959681766  |
| C | 1.2211419884  | -2.3247113776 | 2.1959681766  |
| C | 2.3237382125  | -1.2229928309 | 2.1959681766  |
| H | 1.0615505239  | 2.6882311079  | 3.2170392544  |
| H | -1.0594094771 | 2.6890755965  | 3.2170392544  |
| H | -2.6882311079 | 1.0615505239  | 3.2170392544  |
| H | -2.6890755965 | -1.0594094771 | 3.2170392544  |
| H | -1.0615505239 | -2.6882311079 | 3.2170392544  |
| H | 1.0594094771  | -2.6890755965 | 3.2170392544  |
| H | 2.6882311079  | -1.0615505239 | 3.2170392544  |
| H | 2.6890755965  | 1.0594094771  | 3.2170392544  |
| H | 1.524993892   | 3.1671220938  | 1.5670564814  |
| H | -1.5224713446 | 3.168335483   | 1.5670564814  |
| H | -3.1671220938 | 1.524993892   | 1.5670564814  |
| H | -3.168335483  | -1.5224713446 | 1.5670564814  |
| H | -1.524993892  | -3.1671220938 | 1.5670564814  |
| H | 1.5224713446  | -3.168335483  | 1.5670564814  |
| H | 3.1671220938  | -1.524993892  | 1.5670564814  |
| H | 3.168335483   | 1.5224713446  | 1.5670564814  |
| H | -0.0031334228 | -7.8696902758 | 0.2392103866  |
| H | -0.0029077389 | -7.3028781963 | -4.0250727128 |
| H | -0.0019293812 | -4.8457018572 | -3.6971827946 |
| H | -0.0021559156 | -5.4146501014 | 0.562859739   |
| H | -5.4146501014 | 0.0021559156  | 0.562859739   |
| H | -7.8696902758 | 0.0031334228  | 0.2392103866  |
| H | -7.3028781963 | 0.0029077389  | -4.0250727128 |

|   |               |               |               |
|---|---------------|---------------|---------------|
| H | -4.8457018572 | 0.0019293812  | -3.6971827946 |
| H | 7.3028781963  | -0.0029077389 | -4.0250727128 |
| H | 7.8696902758  | -0.0031334228 | 0.2392103866  |
| H | 5.4146501014  | -0.0021559156 | 0.562859739   |
| H | 4.8457018572  | -0.0019293812 | -3.6971827946 |
| H | 0.0031334228  | 7.8696902758  | 0.2392103866  |
| H | 0.0021559156  | 5.4146501014  | 0.562859739   |
| H | 0.0029077389  | 7.3028781963  | -4.0250727128 |
| H | 0.0019293812  | 4.8457018572  | -3.6971827946 |

Optimized structure of [Y(TPP)(aza12C4)]<sup>+</sup>

|   |               |               |               |
|---|---------------|---------------|---------------|
| Y | -0.0034191915 | -0.0081588228 | -0.0456959405 |
| N | 2.0859568727  | 0.0041349447  | -1.1231546551 |
| N | -0.0101315211 | 2.0681141698  | -1.1421076198 |
| N | -2.0751576849 | -0.0308687446 | -1.142781683  |
| N | 0.0238790205  | -2.0896872562 | -1.145353409  |
| C | 2.8817651094  | 1.124941365   | -1.2610295072 |
| C | 1.0913969581  | 2.8856480688  | -1.2878717638 |
| C | -1.1268438368 | 2.8594427789  | -1.321644354  |
| C | -2.8904987461 | 1.0698747727  | -1.3145226568 |
| C | -2.8716050894 | -1.1484990032 | -1.2814818378 |
| C | -1.0798801422 | -2.9072172768 | -1.2926361828 |
| C | 1.1382657107  | -2.8846262135 | -1.322903711  |
| C | 2.9043760232  | -1.0940818076 | -1.2997204015 |
| C | 2.4402769106  | 2.4654047293  | -1.2929491491 |
| C | 2.4823089691  | -2.4432228933 | -1.3549350215 |
| C | -2.4279488619 | -2.4895873575 | -1.3058130394 |
| C | -2.4676154856 | 2.4165279524  | -1.3622662093 |
| C | 4.2532698743  | 0.7137191943  | -1.4647316671 |
| C | 0.6517588079  | 4.2467872458  | -1.5000607223 |
| C | -0.7118125335 | 4.2281116288  | -1.5347363593 |

|   |               |               |               |
|---|---------------|---------------|---------------|
| C | -4.2550827262 | 0.6276803424  | -1.4982421059 |
| C | -4.2419478847 | -0.736446741  | -1.4873588747 |
| C | -0.6409170591 | -4.2694756217 | -1.5022498109 |
| C | 0.7219746819  | -4.2536383704 | -1.5350494648 |
| C | 4.2692769436  | -0.6498902247 | -1.478647189  |
| H | 1.384772195   | -5.0864018402 | -1.7200011352 |
| H | -1.290571321  | -5.1198756138 | -1.6486647966 |
| H | 5.0884100232  | 1.38175271    | -1.61765634   |
| H | 5.1211396066  | -1.2946099547 | -1.63802311   |
| H | 1.2999317858  | 5.098303026   | -1.6463628002 |
| H | -1.3753328317 | 5.0598448843  | -1.7216931434 |
| H | -5.1061436873 | 1.2739224385  | -1.655248537  |
| H | -5.077948967  | -1.4031112921 | -1.6415452696 |
| N | 1.3066215914  | -1.5613856085 | 1.6904065229  |
| O | 1.460013825   | 1.2603740341  | 1.7375452545  |
| O | -1.2491436952 | 1.5155293438  | 1.7116866837  |
| O | -1.4580672782 | -1.1890926293 | 1.7397983253  |
| C | 2.0740176159  | -0.8610067232 | 2.7400582061  |
| C | 2.5718803538  | 0.480276062   | 2.2125777505  |
| C | 0.8703825171  | 2.1210858045  | 2.7171534002  |
| C | -0.445195214  | 2.6233675422  | 2.1451860745  |
| C | -2.0819881513 | 0.9336753906  | 2.7205637846  |
| C | -2.5744376187 | -0.3966764234 | 2.174639583   |
| C | -0.8795219608 | -2.027713693  | 2.749271966   |
| C | 0.4079866957  | -2.620835322  | 2.1954050931  |
| H | 2.9234827866  | -1.4595097995 | 3.1014227052  |
| H | 1.538318985   | 2.9672683966  | 2.9261791786  |
| H | -1.5818729376 | -2.8308946953 | 3.0057361289  |
| H | -2.9308757947 | 1.5961678795  | 2.9348061618  |
| H | 1.4153368904  | -0.6937625297 | 3.5987158327  |
| H | 0.709201549   | 1.5706336702  | 3.6545934001  |
| H | -0.6910603969 | -1.4400179498 | 3.6581653154  |
| H | -1.5113502876 | 0.7920996376  | 3.6484047509  |
| H | 3.2366296425  | 0.3473564936  | 1.3558695827  |

|   |               |               |               |
|---|---------------|---------------|---------------|
| H | -0.2705514754 | 3.2337459963  | 1.2577807632  |
| H | -3.1988798618 | -0.2424177086 | 1.2929336231  |
| H | 0.169960657   | -3.2791558917 | 1.3563747346  |
| H | 3.1149782748  | 1.0323575905  | 2.9884426554  |
| H | -0.9853919696 | 3.2239095575  | 2.886715603   |
| H | -3.1569571645 | -0.935667619  | 2.9309967374  |
| H | 0.8800014989  | -3.2318806716 | 2.9796724412  |
| H | 1.9637200104  | -1.9904064516 | 1.0366702704  |
| H | -4.18357741   | -3.3477912289 | 0.5821709313  |
| C | -4.3142947466 | -3.8696232187 | -0.3625405127 |
| C | -5.3015732523 | -4.8487540543 | -0.4855562002 |
| H | -5.9349021541 | -5.0870836663 | 0.3645482978  |
| C | -5.4738319398 | -5.5201742471 | -1.6976250977 |
| H | -6.2428769785 | -6.2810743596 | -1.7952292202 |
| C | -4.6551225351 | -5.2060194731 | -2.7843665295 |
| H | -4.7881979371 | -5.7185169951 | -3.7329925675 |
| C | -3.6666892219 | -4.2280911454 | -2.6602645258 |
| H | -3.0376274264 | -3.9798454175 | -3.5106238388 |
| C | -3.4817664834 | -3.5490528608 | -1.4456285116 |
| H | 5.9484268261  | 5.0604788294  | 0.3794049173  |
| C | 5.3138503247  | 4.8241188259  | -0.4703643874 |
| C | 4.3287165933  | 3.8425300005  | -0.3490194625 |
| H | 4.2007179846  | 3.3170267592  | 0.5940132339  |
| C | 3.4944616136  | 3.5244780161  | -1.4316901854 |
| C | 3.6759280723  | 4.208357038   | -2.6441762594 |
| H | 3.0456648199  | 3.9622343803  | -3.494261867  |
| C | 4.6621059185  | 5.1887301701  | -2.7666004112 |
| H | 4.7921710807  | 5.7050439723  | -3.7135580788 |
| C | 5.4821975031  | 5.5005930073  | -1.6801296054 |
| H | 6.2492172237  | 6.2637432517  | -1.7763462074 |
| H | -3.3299275688 | 4.2646578279  | 0.4388525712  |
| C | -3.8480987916 | 4.3493542801  | -0.5129678926 |
| C | -4.8265382109 | 5.3293713729  | -0.6877982645 |
| H | -5.0680039991 | 6.0032648092  | 0.129663874   |

|   |               |               |               |
|---|---------------|---------------|---------------|
| C | -5.4934494795 | 5.4426858331  | -1.9091319611 |
| H | -6.2539157309 | 6.2059084417  | -2.0468566557 |
| C | -5.1754529324 | 4.572187678   | -2.95379614   |
| H | -5.6843424892 | 4.6588444928  | -3.909678933  |
| C | -4.1984512269 | 3.5910745858  | -2.7778862559 |
| H | -3.9473593217 | 2.9212553966  | -3.5956673389 |
| C | -3.523623847  | 3.4651537137  | -1.5532673673 |
| H | 5.1177490701  | -6.0565796664 | 0.0266587387  |
| C | 4.8596560506  | -5.368225317  | -0.7733232089 |
| C | 3.8848513263  | -4.3918654211 | -0.5604849398 |
| H | 3.3864604555  | -4.3315158816 | 0.4044452911  |
| C | 3.5372458786  | -3.4888059494 | -1.5766323721 |
| C | 4.1866393333  | -3.5926078481 | -2.8171646363 |
| H | 3.9181902002  | -2.9081844068 | -3.6170255633 |
| C | 5.1601976146  | -4.5692720467 | -3.0316919894 |
| H | 5.6485879548  | -4.637927711  | -3.9996141679 |
| C | 5.500598073   | -5.4586056259 | -2.0101841871 |
| H | 6.2581577078  | -6.2186372875 | -2.1780510726 |
